1  
2  
3  
4  
5  
6  
7  
8  
9  
10  
11  
12  
13  
14  
15  
16  
17  
18  
19  
20  
21  
22  
23  
24  
25  
26  
27  
28  
29  
30  
31

**Variation in neuronal activity state, axonal projection target, and position principally define the transcriptional identity of individual neocortical projection neurons**

*Maxime Chevé<sup>1,2</sup>, Johanna D. Robertson<sup>3</sup>, Gabrielle H. Cannon<sup>4</sup>  
Solange P. Brown<sup>2,\*</sup> and Loyal A. Goff<sup>2,4,\*</sup>*

**Affiliations:**

<sup>1</sup>Biochemistry, Cellular and Molecular Biology Graduate Program, Johns Hopkins University School of Medicine, Baltimore, Maryland, 21205, USA.

<sup>2</sup>Solomon H. Snyder Department of Neuroscience, Johns Hopkins University School of Medicine, Baltimore, Maryland, 21205, USA.

<sup>3</sup>Human Genetics Training Program, McKusick-Nathans Institute for Genetic Medicine, Johns Hopkins University School of Medicine, Baltimore, Maryland, 21205, USA.

<sup>4</sup>McKusick-Nathans Institute for Genetic Medicine, Johns Hopkins University School of Medicine, Baltimore, Maryland, 21205, USA.

\* Corresponding Authors: [spbrown@jhmi.edu](mailto:spbrown@jhmi.edu) (SPB) and [loyalgoff@jhmi.edu](mailto:loyalgoff@jhmi.edu) (LAG)

32 **ABSTRACT**

33 **Single-cell RNA sequencing technologies have generated the first catalogs of transcriptionally**  
34 **defined neuronal subtypes of the brain. However, the biologically informative cellular**  
35 **processes that contribute to neuronal subtype specification and transcriptional heterogeneity**  
36 **remain unclear. By comparing the gene expression profiles of single layer 6 corticothalamic**  
37 **neurons in somatosensory cortex, we show that transcriptional subtypes primarily reflect**  
38 **axonal projection pattern, laminar position within the cortex, and neuronal activity state.**  
39 **Pseudotemporal ordering of 1023 cellular responses to manipulation of sensory input**  
40 **demonstrates that changes in expression of activity-induced genes both reinforced cell-type**  
41 **identity and contributed to increased transcriptional heterogeneity within each cell type. This**  
42 **is due to cell-type specific biases in the choice of transcriptional states following manipulation**  
43 **of neuronal activity. These results reveal that axonal projection pattern, laminar position, and**  
44 **activity state define significant axes of variation that contribute both to the transcriptional**  
45 **identity of individual neurons and to the transcriptional heterogeneity within each neuronal**  
46 **subtype.**

## 47 INTRODUCTION

48 Single-cell RNA sequencing (scRNA-seq) approaches have been harnessed to reveal  
49 previously hidden levels of complexity in cell types and states within a given tissue<sup>1,2</sup>. Nowhere  
50 is this more relevant than in the mammalian central nervous system, an organ system  
51 dependent on a remarkable diversity of cell types and cell states for its function. The neocortex  
52 contains a wide variety of neuronal cell types organized into the circuits that direct higher brain  
53 functions such as perception, memory and cognition. Furthermore, cortical neurons are highly  
54 dynamic, undergoing significant changes in gene expression during development and  
55 throughout adulthood in response to activity and experience<sup>3-8</sup>. Recent studies have generated a  
56 more comprehensive ‘parts list’ of discrete cell types within the neocortex than previously  
57 available<sup>9-16</sup>. While such surveys yield insights into the diversity of cortical cell types, the sources  
58 of transcriptional variation both within and across cell types remain poorly understood<sup>17-19</sup>.

59 We compared expression profiles of layer 6 corticothalamic neurons (L6CThNs), a  
60 heterogeneous population of related cortical projection neurons defined in anatomical,  
61 functional, and gene expression studies, making them ideally suited for investigating the  
62 relationships between transcriptional subtypes and other cellular properties<sup>12, 16, 20-29</sup>. By  
63 combining scRNA-seq with an enrichment strategy that preserved axonal target information, we  
64 identified two transcriptionally distinct L6CThN subtypes that each demonstrates a reproducible  
65 bias for long-range projection targets. The transcriptional profiles of L6CThNs also reflect their  
66 laminar position within L6. These two L6CThN subtypes exhibit divergent signatures of neuronal  
67 activity both in their baseline expression patterns as well as in their responses following  
68 manipulation of sensory input. The subtype biases in the choice of response following sensory  
69 manipulation increased transcriptional heterogeneity both within and between cell types and

70 reinforced the transcriptional identities of the two L6CThN subtypes. These results demonstrate  
71 that scRNA-seq resolves relationships between gene expression and features such as axonal  
72 projection pattern, spatial organization, and cell state, and identifies the independent  
73 contributions of multiple biological signals that together determine transcriptional  
74 heterogeneity within and across neuronal populations.

75

## 76 **RESULTS**

### 77 ***Transcriptional profiling of layer 6 corticothalamic neurons reveals two subtypes which reflect*** 78 ***axonal projection bias***

79 Studies of primary sensory cortex demonstrate that L6CThNs are heterogeneous<sup>20-29</sup>. In rat  
80 barrel cortex, L6CThNs in upper layer 6 project to the ventral posterior medial nucleus (VPM) of  
81 the thalamus, while L6CThNs in lower layer 6 project to both VPM and the posterior medial  
82 nucleus (POm)<sup>21, 25</sup>. To distinguish between these two projection classes in mouse, we first  
83 validated Cre recombinase expression as a reliable marker for L6CThNs in the barrel cortex of  
84 *Neurotensin receptor 1-Cre* mice<sup>30-32</sup> (Fig. 1a-e; *Ntsr1-Cre*, Gensat 220). Next, we showed that a  
85 subset of Cre-expressing, VPM-projecting L6CThNs in lower layer 6 also projects to POm (Fig. 1f-  
86 j).

87 To determine whether L6CThNs subclasses projecting to VPM only or to both VPM and  
88 POm are distinguished by their gene expression profiles, we labeled the two subclasses in  
89 adolescent mice, microdissected barrel cortex containing retrogradely labeled cells, dissociated  
90 the tissue into a single-cell suspension, sorted the differentially labeled L6CThNs using  
91 Fluorescence Assisted Cell Sorting (FACS; Supplementary Fig. 1a-b), and collected enriched  
92 populations of each subclass for bulk RNA sequencing. We identified 69 genes with significant

93 differential expression (DE) between the two sorted populations (Fig. 1k, Supplementary File 1,  
94 Supplementary Table 1; Cuffdiff2; 10% false discovery rate (FDR)). These 69 DE genes  
95 demonstrate that subclasses of L6CThNs distinguished by their long-range axonal projection  
96 patterns are differentiated by their gene expression profiles.

97 This bulk analysis was predicated on prior knowledge of existing morphological  
98 subclasses and may have obscured underlying transcriptional subtypes that comprise each  
99 projection class of L6CThNs. To resolve transcriptionally defined subtypes of L6CThNs, we next  
100 evaluated the gene expression landscape of single L6CThNs using an unbiased classification  
101 approach. We first sorted individual, labeled L6CThNs (Supplementary Fig. 1c) and collected 96  
102 VPM-only and 96 VPM/POm L6CThNs from each of two replicate mice, totaling 384 single  
103 L6CThNs. Individual cell lysates were subjected to a modified Smart-Seq2 library preparation  
104 and scRNA-seq analysis. In total, 346 single L6CThNs passed quality control filters and were used  
105 for further analysis (Supplementary Fig. 1d-i; Supplementary File 2). We confirmed the fidelity of  
106 our enrichment by assessing each cell for neuronal and non-neuronal markers (Supplementary  
107 Fig. 1j).

108 To identify transcriptional subtypes of L6CThNs, we selected genes with the greatest  
109 likelihood of contributing to differences across the ensemble of single L6CThNs by identifying  
110 genes with high residuals to a mean-variance model fit independently in each of the two  
111 replicates and selecting the intersection of these two sets (Supplementary Fig. 2a). These 261  
112 genes with high dispersion were therefore depleted for genes associated with technical  
113 variation between replicates<sup>33, 34</sup> (Supplementary Table 2). Weights on the first three significant  
114 principal components across all cells using this gene set<sup>35</sup> (Supplementary Fig. 2b; permutation  
115 parallel analysis;  $p < 0.001$ ) were used for a tSNE dimensionality reduction followed by k-means

116 clustering (Fig. 2a). Single-cell transcriptional profiles of the 346 L6CThNs clustered into at least  
117 two distinct subtypes. Fitting the data to three subtypes (k=3) or more did not significantly  
118 improve the performance of the clustering (Supplementary Fig. 2c). We compared our  
119 classification approach to several recently described single-cell clustering utilities<sup>36, 37</sup> and found  
120 a high-degree of agreement (Supplementary Fig. 2d; SC3: 93.77% agreement; CIDR: 90%  
121 agreement). These results indicate that independent, unbiased clustering approaches based on  
122 genes with higher than expected variance across the L6CThN population identify two major  
123 subtypes of L6CThN.

124 To determine the relationship between transcriptional identity and morphological  
125 subtypes, we next compared the distribution of VPM-only and VPM/POm projection labels  
126 across the two transcriptionally defined subtypes (Fig. 2b). The majority of neurons in subtype 2  
127 were labeled VPM-only (79%, 103 of 130 cells,  $p < 3.768 \times 10^{-17}$ , hypergeometric test) while most  
128 neurons in subtype 1 were VPM/POm (65%, 141 of 216 cells,  $p < 3.768 \times 10^{-17}$ , hypergeometric  
129 test), a distribution significantly different from that expected by chance. Furthermore, the  
130 axonal projection bias was reproducible across replicates (Fig. 2c) even though the segregation  
131 of projection-defined subclasses was incomplete for both transcriptionally defined subtypes.  
132 Together our results indicate that each transcriptionally defined subtype of L6CThN is enriched  
133 for neurons targeting specific sets of thalamic nuclei.

134

### 135 ***Transcriptional differences between subtypes of layer 6 corticothalamic neurons***

136 To assess the transcriptional differences between the two identified L6CThN subtypes, all  
137 expressed genes were subjected to the Monocle2 differential test, using model formulas that  
138 accounted for both batch effects and the number of genes detected in each cell, a proxy

139 measure for efficiency of RNA capture and library synthesis. We identified 286 genes that were  
140 significantly differentially expressed between the two subtypes (Fig. 2d; Monocle likelihood  
141 ratio test, 0.1% FDR; Supplementary File 2, Supplementary Table 3), only six of which overlapped  
142 with the 69 DE genes observed in our bulk RNA-seq analysis of sorted L6CThNs despite the high  
143 correlation between our bulk RNA-seq and scRNA-seq data (Supplementary Fig. 2e-g). This  
144 result, in conjunction with our previous observation of incomplete label segregation across  
145 L6CThN cell types, suggests that this discrepancy is primarily due to significant sample  
146 heterogeneity arising from retrograde label inefficiencies. Importantly, parameters such as total  
147 mapped fragments (mass), total estimated mRNAs per cell, number of genes detectably  
148 expressed per cell, and replicate did not result in biased clustering across the DE gene list (Fig.  
149 2d), suggesting a minimal influence of technical variation on the list of DE genes. The significant  
150 differential expression of genes, including *Fxyd6* and *Lamp5*, between the two subtypes was  
151 consistent with expression patterns seen in the Allen Mouse Brain Atlas<sup>38</sup> (Fig. 2e;  
152 <http://mouse.brain-map.org>, *Fxyd6*-RP\_051017\_01\_E10-coronal, *Lamp5*-RP\_050725\_01\_B03-  
153 coronal). The two subtypes also shared some transcriptional similarities with two recently  
154 defined subtypes in primary visual cortex<sup>12</sup> (Supplementary Fig. 3). Several long non-coding  
155 RNAs (lncRNAs) were also specifically enriched in each subtype. For example, *linc-Tmem20*<sup>8</sup> was  
156 significantly enriched in subtype 1 L6CThNs (Fig. 2f) and was preferentially expressed in lower  
157 layer 6 (Fig. 2g). Conversely, the lncRNA *Pantr1* was the gene with the greatest predictive power  
158 for neurons in subtype 2 (Fig. 2f, AUC = 0.876, power = 0.752, ROC analysis). Using a mouse line  
159 in which *LacZ* was knocked into the *Pantr1* locus<sup>39</sup>, we confirmed greater *LacZ* expression in  
160 VPM-only L6CThNs relative to VPM/POm L6CThNs (Fig. 2h,i). Furthermore, in contrast to our  
161 analysis of L6CThNs by anatomical labeling, we found that the total number of genes with

162 detectable expression in each transcriptional subtype was significantly greater for subtype 1  
163 relative to subtype 2, a finding consistent across replicates (Fig. 2j), and that the mean pairwise  
164 Euclidean distance between cells within each subtype was also greater in subtype 2 than in  
165 subtype 1, indicating greater cell-cell variation across subtype 2 (Fig. 2k; subtype 1  $\mu=72.16$ ,  
166  $\sigma=5.80$ ; subtype 2  $\mu=80.59$ ,  $\sigma=7.07$ ;  $p < 2.2 \times 10^{-16}$ , Welch's two-sample t-test). Importantly, we  
167 found only two genes, *Lypd1* and *Calm2*, with a significant combinatorial effect of subtype and  
168 label, suggesting that label does not distinguish subpopulations within each subtype. Together,  
169 these data identify two L6CThN subtypes and confirm a relationship between transcriptionally  
170 defined neuronal subtypes and the projection targets of these neurons.

171 To identify cellular processes that differentiate the two transcriptional subtypes of  
172 L6CThNs, we queried the DE gene list for enrichment of annotated gene sets from public  
173 databases (Supplementary Fig. 4a-d). Significant gene sets included Gene Ontology and  
174 Reactome terms related to general features of neurons such as “Neuronal part” and “Synaptic  
175 transmission” ( $p < 0.01$ ; hypergeometric test, Benjamini-Hochberg corrected), highlighting the  
176 limited resolution of gene sets in currently available public databases for generating biological  
177 insights among neuronal subtypes. To identify more informative biological processes that shape  
178 differences in the response properties of L6CThNs, we compared the expression of voltage-  
179 gated ion channels, neurotransmitter receptors and neuropeptides, a number of which were  
180 differentially expressed (Supplementary Fig. 4e-h). Several G protein-coupled receptors and  
181 neuropeptides were differentially expressed. For example, *Adcyap1* (PACAP) and a gene  
182 encoding a peptide for processing PACAP, *Pam*, were preferentially expressed in subtype 2  
183 (Supplementary Fig. 4h-i). Interestingly, receptors for PACAP are found in primary sensory  
184 thalamic nuclei<sup>40</sup> and modulate thalamocortical interactions<sup>41</sup>, consistent with the projection



185 pattern bias of subtype 2 L6CThNs. Our data indicate that a focused analysis identifies gene  
186 expression differences that reflect relevant functional features.

187

188 ***Distinct cellular processes are coordinately regulated within subtypes of L6CThN***

189 To identify cellular processes that contribute to the heterogeneity of gene expression across the  
190 transcriptomes of all L6CThNs analyzed, we performed a weighted gene co-expression network  
191 analysis (WGCNA) on all genes expressed in the 346 L6CThNs<sup>42</sup>. This analysis yielded 22 modules  
192 of co-regulated genes, which we classified using hierarchical clustering (Fig. 3a, Supplementary  
193 Fig. 5a). We tested for significant correlations between subtype identity for each cell and the  
194 eigenvalues of each module. Three modules significantly correlated with subtype 1 (Black,  
195 Turquoise, and Cyan; Fig. 3b, Supplementary Fig. 5b;  $p < 0.01$ ; Pearson's product moment  
196 correlation test) and four with subtype 2 (Red, Purple, Blue and Midnight Blue; Fig. 3b,  
197 Supplementary Fig. 5b;  $p < 0.01$ ; Pearson's product moment correlation test). When the same  
198 analysis was performed based on cell label, VPM-only or VPM/POm, correlation coefficients and  
199 confidence measures were all weakened (Fig. 3b, Supplementary Fig. 5c). These seven modules  
200 also showed significant correlation with the first principal component of the PCA on the high-  
201 variance gene set (Fig. 3c, Supplementary Fig. 3h), suggesting that subtype identity explains a  
202 significant amount of variation in gene expression across these neurons. Five of these modules  
203 were enriched for genes identified as significantly differentially expressed between subtype 1  
204 and subtype 2 (Fig. 3d, Supplementary Fig. 3d). No module was correlated with replicate or  
205 other potentially confounding technical parameters (Supplementary Fig. 5f,g), confirming that  
206 the variations we observe are driven by biological differences among neurons rather than  
207 technical variation. Taken together, these data demonstrate that the greatest source of

208 variation in the transcriptomes of L6CThNs is the difference between subtypes and reveal  
209 several discrete modules of gene expression contributing to this difference.  
210  
211 ***Projection-dependent and position-dependent gene expression differences contribute to the***  
212 ***transcriptional identity of layer 6 neurons***  
213 Although the transcriptional signature of L6CThNs reflects projection target bias, axonal  
214 projection pattern and sublaminar position are confounded among L6CThNs. VPM/POm  
215 neurons are predominantly located in lower layer 6 while VPM-only neurons are biased towards  
216 upper layer 6 (Fig. 1h). Thus the gene expression differences we identified may represent  
217 differences in sublaminar position within layer 6 rather than axonal projection pattern *per se*. To  
218 test this hypothesis, we took advantage of the fact that L6CThNs represent only approximately  
219 half of the neurons in layer 6<sup>29, 31</sup>. If a gene's expression reflects axonal projection pattern, its  
220 expression should be restricted to L6CThNs in upper or lower layer 6 only. On the other hand, if  
221 a gene's expression reflects laminar position, we predict that its expression would be restricted  
222 to neurons in either upper or lower layer 6, regardless of their projection pattern.  
223 To select target genes to evaluate using single molecule fluorescence *in situ*  
224 hybridization (smFISH), we performed a PCA on the mean-centered expression estimates of the  
225 high-variance genes across all 346 L6CThNs and used the rotations from this analysis to project  
226 all expressed genes into this PCA space to rank order candidate genes (Supplementary Fig. 6a-d).  
227 We quantified the expression of target gene mRNAs in individual tdTomato-positive, NeuN-  
228 positive neurons identified as L6CThNs and in tdTomato-negative, NeuN-positive neurons in  
229 slices of barrel cortex from Ntsr1-Cre;tdTomato mice. These data were then fit to a generalized  
230 additive model to test the independent contributions of laminar position and expression of

231 tdTomato (Fig. 4). We found that *Lamp5*, *Serpini1* and *Gabra5* were selectively expressed in a  
232 subtype of L6CThNs (Fig. 4b,e-f). In contrast, *Pantr1* varied with laminar position within layer 6  
233 in both L6CThNs and non-L6CThNs (Fig. 4c). Our findings reveal that information about position  
234 within layer 6 and long range axonal projection pattern is contained in the gene expression  
235 differences between the two transcriptional subtypes of L6CThNs.

236

237 ***Neural activity significantly contributes to transcriptionally defined subtype identity*** Neuronal  
238 activity is known to strongly influence gene expression<sup>4-6</sup>. We therefore hypothesized that  
239 neuronal activity state influences the transcriptional profiles of the L6CThNs and may contribute  
240 to their transcriptional identity. To test whether any modules reflect activity state, we assessed  
241 genes assigned to each module for enrichment of a curated gene set representing the ensemble  
242 of genes regulated after induction of neural activity compiled from recently published studies<sup>43-</sup>  
243 <sup>46</sup> (Fig. 3e, Supplementary Fig. 5, Supplementary Table 4). Four of the seven modules correlated  
244 with transcriptional subtype (Black, Green, Purple, and Midnight Blue) were significantly  
245 enriched for genes induced by neuronal activity<sup>43-46</sup> (Fig. 3e, Supplementary Fig. 5,  $p < 0.01$ ,  
246 hypergeometric test). Each of these four modules was also significantly correlated with the first  
247 and second principal components of the PCA on the high-variance gene set, suggesting that  
248 differences in neuronal activity state explain a significant amount of transcriptional variation  
249 across L6CThNs as well. Taken together, our results show that the long range axonal projection  
250 pattern, laminar position within layer 6, and the activity state of each neuron are all reflected in  
251 the transcriptional profiles of individual L6CThNs and are principal contributors to the identity of  
252 the two L6CThN subtypes.

253         Among the four activity-associated modules (Black, Green, Purple, and Midnight Blue),

254 Black was specifically correlated with subtype 1, and Purple and Midnight Blue with subtype 2,  
255 suggesting subtype-specific engagement of activity-induced genes in the steady state. The  
256 Green module was correlated with PC1-PC3, but demonstrated no significant bias for either cell  
257 type. To assess whether these signatures of neuronal activity represent a fundamental aspect of  
258 subtype identity, we re-evaluated our classification workflow after regressing out the  
259 eigenvalues for each activity-associated module and observed a reduction in the separation of  
260 the two L6CThN subtypes in each case, suggesting that steady state differences in neuronal  
261 activity genes are a defining characteristic of these two L6CThN subtypes (Supplementary Fig.  
262 6e).

263 To further test the influence of neuronal activity on transcriptional identity, we  
264 evaluated the enrichment of activity genes along the first two principal components of a gene-  
265 centric PCA of the mean-centered expression estimates of high variance genes across all 346  
266 L6CThNs. All expressed genes were projected in this PCA space and ranked using their weights  
267 along PC1 and PC2 (Supplementary Fig. 6a-d). Both PC1 and PC2 were significantly enriched for  
268 genes drawn from our curated list of activity-induced genes<sup>43-46</sup> ( $p < 0.01$ ; Kolmogorov-Smirnov  
269 test, Pre-ranked GSEA). The expression levels of the most heavily weighted PC1 genes varied  
270 predominantly between subtypes (Fig. 5b-c), while the expression levels of heavily weighted PC2  
271 genes additionally varied within each subtype in a pattern similar to classical activity-induced  
272 genes like *Fos* and *Bdnf* (Fig. 5d-g), suggesting that activity contributes both to subtype identity  
273 and to transcriptional heterogeneity within each subtype. The expression patterns of genes such  
274 as *Cdh13*, *Igf1bp6*, and *Sla* that strongly contributed to both PC1 and PC2 provide further  
275 evidence that axonal projection pattern, laminar location, and activity state are not fully  
276 orthogonal axes contributing to cellular identity (orange asterisks, Fig. 5c, Supplementary Fig.

277 6c,d). These data indicate that neuronal activity accounts for significant variation in the gene  
278 expression of L6CThNs, contributing to transcriptional heterogeneity both within and between  
279 L6CThN subtypes.

280

### 281 ***Modulation of neuronal activity influences the transcriptional state and identity of L6CThNs***

282 Our data demonstrate that the gene expression profiles of L6CThNs reflect an integration of  
283 multiple basis vectors corresponding to discrete, but potentially dependent sources of variation  
284 dominated by axonal projection pattern, sublamina position within layer 6 and neuronal  
285 activity. Alterations in the molecular cascades engaged by different patterns of neural activity  
286 therefore have the potential to modulate the transcriptional identity of L6CThNs. To test this  
287 hypothesis, we unilaterally removed whiskers in a chessboard pattern, a pattern of sensory  
288 deprivation shown to engage plasticity mechanisms in the barrel cortex<sup>47, 48</sup>, from Ntsr1-  
289 Cre;tdTomato mice which were bilaterally injected with a retrograde tracer in POM to label  
290 VPM-only and VPM/POM L6CThNs as in our baseline experiments (Fig. 6a). At one and seven  
291 days following this sensory manipulation, we collected and sequenced single L6CThNs from the  
292 barrel cortex both contralateral and ipsilateral to the manipulation. After preprocessing and  
293 quality control, we obtained high-quality transcriptional profiles for 133 of 151 sequenced  
294 L6CThNs from 2 replicates one day following whisker removal (Day 1) and for 550 of 563  
295 sequenced L6CThNs from 2 replicates seven days following whisker removal (Day 7). When  
296 combined with L6CThNs collected under baseline conditions (Day 0), we generated a data set  
297 comprised of 1023 sequenced L6CThNs collected from two replicates at each of three time  
298 points (Supplementary Fig. 7a-d, Supplementary File 3).

299 To assign each newly acquired L6CThN to its transcriptional subtype, gene expression

300 profiles were first pre-processed and normalized as described for the baseline data set (Day 0).  
301 We then performed a PCA using the 286 genes we identified as differentially expressed between  
302 transcriptional L6CThN subtypes under baseline conditions and a tSNE analysis on the 1023  
303 L6CThNs (Fig. 6b). Neurons were clustered using a Gaussian mixture model<sup>49, 50</sup> (MClust), and  
304 cluster assignments were used to designate a subtype identity to each newly profiled neuron.  
305 This approach largely recapitulated our original subtype assignments, as only ten neurons  
306 classified under baseline conditions were assigned to a different subtype (Fig. 6c). The significant  
307 axonal projection bias of the two transcriptional subtypes was maintained as subtype 1 neurons  
308 were predominantly labeled VPM/POm (70.7%, 408 of 585 cells,  $p < 2.97 \times 10^{-71}$ , hypergeometric  
309 test) and subtype 2 VPM-only (84.2%, 369 of 438 cells,  $p < 2.97 \times 10^{-71}$ , hypergeometric test),  
310 highlighting the reproducibility of our method and the robustness of our subtype assignment  
311 (Fig. 6d).

312 We identified 1134 genes with significant differential expression across the three time  
313 points sampled, independent of stable, baseline differences in expression between the two  
314 transcriptional subtypes (Fig. 6e,  $q \leq 0.001$ ; Monocle2 test). A k-means clustering analysis of  
315 mean expression profiles identified 16 clusters of genes with different temporal expression  
316 following deprivation, but failed to identify any clusters with significant subtype-specific effects  
317 over time (Fig. 6e). However, the transcriptional changes induced in response to altered sensory  
318 input are unlikely to be synchronous across all neurons collected at each time point. To describe  
319 the cellular responses to altered sensory input without the confounding effects of neurons in  
320 diverse states intermixed at each time point, we established a pseudotemporal ordering for the  
321 1023 L6CThNs derived from the 1134 genes with significant differential expression across time  
322 points (Fig. 7a). Briefly, using the Monocle2 DDRTree algorithm, cells were arranged in an

323 embedded graph representation in a reduced dimensional space. In this manner, cells with  
324 similar expression profiles across the 1134 target genes were positioned next to each other, and  
325 a traversal through the graph revealed the sequence of transcriptional changes that reflect  
326 progression through a given biological process. Through this projection, we captured a smooth  
327 representation of transcriptional modulation to altered sensory input. As expected, the  
328 distribution of L6CThNs along pseudotime generally followed the temporal order of collection  
329 following whisker removal (Fig. 7a,b). Nonetheless, neurons from each time point were found  
330 throughout pseudotime, confirming that the transcriptional response to sensory manipulation is  
331 asynchronous across the population of L6CThNs. Interestingly, we observed no bias in the  
332 distribution of L6CThNs across pseudotime when the neurons were grouped by hemisphere ipsi-  
333 or contralateral to whisker removal, suggesting that longer term transcriptional responses in  
334 L6CThNs from both hemispheres are similar (Supplementary Fig. 7e).

335 We identified 1507 genes that were differentially expressed across pseudotime at a  
336 much higher stringency than our aggregate analysis independent of transcriptional subtype  
337 designation ( $q \leq 0.0000001$ ; Monocle2), indicating that a significantly greater fraction of the  
338 transcriptome was identified as modulated by sensory manipulation using the increased  
339 resolution of pseudotemporal ordering. To identify cellular processes modulated along  
340 pseudotime, we clustered the normalized response curves of the differentially expressed genes  
341 (Fig. 7c, Supplementary Table 5) and queried each cluster for enrichment of annotated gene sets  
342 from public databases and our curated list of activity-induced genes. The cluster with the  
343 earliest changes in expression (Cluster 2) corresponded to significant downregulation of the  
344 activity-associated genes ( $p < 5.65 \times 10^{-7}$ , hypergeometric test) that were enriched in the four  
345 activity-associated modules contributing to cellular identity. In contrast, the cluster representing

346 the late response (Cluster 3) corresponded to upregulation of genes associated with chromatin  
347 remodeling and reorganization as well as upregulation of lncRNAs, suggesting a slower  
348 epigenetic response to sensory manipulation. Interestingly, genes associated with long-term  
349 potentiation (LTP) from Cluster 2 (*Calm1*, *Calm2*, *Gria1*, *Gria2*, *Plcb1*, *Plcb4*, *Ppp1ca*, and *Ppp3r1*)  
350 were downregulated early in the response while LTP-associated genes in Cluster 3 (*Crebbp*,  
351 *Adcy1*, *Grin1*, *Prkcb*, *Ppp3ca*, and *Ppp3cb*) were upregulated towards the end of pseudotime,  
352 suggesting that non-overlapping subsets of genes in this single gene set are regulated at distinct  
353 phases of the L6CThN response to sensory manipulation. We also identified 75 transcription  
354 factors (TFs) with significant differential regulation after sensory manipulation including activity-  
355 associated TFs<sup>5,6</sup> such as *Arc*, *Fos*, *Ier2*, *Junb*, *Mef2c*, and *Nr4a1*, which were expressed early and  
356 downregulated over the course of pseudotime. Several TFs involved in neural development<sup>3</sup>  
357 including *Neurod6*, *Fezf2*, *Mef2c*, and *Foxp2* were transiently expressed during the response,  
358 suggesting a regulatory relationship between activity-dependent plasticity and neural  
359 development.

360

### 361 ***Activity induced changes in gene expression enhance the distinction between subtypes***

362 Our data demonstrate that a transcriptional signature of activity significantly contributes to  
363 L6CThN subtype identity under baseline conditions, and that altered sensory inputs result in  
364 dramatic transcriptional responses in L6CThNs. These results suggest that the response to  
365 sensory manipulation may alter the transcriptional relationship among neurons of the same  
366 subtype as well as the distinction between the two transcriptionally defined L6CThN subtypes.  
367 To test these hypotheses, we assessed the distribution of pairwise Euclidean distances of the  
368 variance stabilized gene expression estimates across all expressed genes for L6CThNs within



369 each subtype for each day following sensory manipulation. In both subtypes, we observed that  
370 the response to altered sensory input resulted in an increased mean distance among cells across  
371 days (Fig. 8a;  $p < 2.2 \times 10^{-16}$ , Welch's two-sample t-test). We also identified a significant increase  
372 in the variance of the intra-subtype distances across days ( $p < 3.59 \times 10^{-5}$ , F-test) for all adjacent  
373 time points except for subtype 2 Day 1 versus Day 7, indicating that the cell-to-cell variation  
374 within both L6CThN subtypes increases in response to altered sensory input. Second, we  
375 assessed the distribution of the inter-subtype pairwise Euclidean distances between subtype 1  
376 and subtype 2. We found that the mean distance significantly increased from Day 0 to Day 1 as  
377 well as from Day 1 to Day 7 (Fig. 8b;  $p < 2.2 \times 10^{-16}$ , Welch's two-sample t-test) as did the  
378 variance of inter-subtype distances ( $p < 4.67 \times 10^{-8}$ , F-test). These results demonstrate that  
379 modulation of neuronal activity increases both the transcriptional heterogeneity within each  
380 L6CThN subtype and the relative transcriptional differences between L6CThN subtypes,  
381 confirming a dependent relationship between activity level and transcriptional identity.

382

### 383 ***Subtype-biased responses contribute to transcriptional heterogeneity and subtype identity***

384 These results raise the possibility that subtype-specific responses to sensory manipulation drive  
385 the increase in transcriptional heterogeneity and enhance the distinction between L6CThN  
386 subtypes. We found that subtype 1 and subtype 2 were differentially distributed along  
387 pseudotime at each time point assessed following sensory manipulation (Fig. 8c). Furthermore,  
388 pseudotemporal ordering identified a single major branch point in the transcriptional responses,  
389 with each of the two subsequent branches exhibiting a significant bias for a specific L6CThN  
390 subtype (Branch A and Branch B; Fig. 8d). Consistent with the proportion of the two subtypes in  
391 the baseline data, neither subtype 1 nor subtype 2 was significantly enriched in the root state

392 (grey arrow; Subtype 1:  $p < 0.0715$ ; Subtype 2:  $p < 0.91$ , hypergeometric test), indicating that  
393 both transcriptional subtypes share a similar early response to sensory manipulation. In  
394 contrast, Branch A and Branch B exhibited significant subtype bias: Branch A (red arrow) was  
395 biased for subtype 1 (VPM/POM; 80.4%, 148/184 neurons;  $p < 7.03 \times 10^{-14}$ , hypergeometric test)  
396 and Branch B (blue arrow) for subtype 2 (VPM-only; 58.4%, 202/346 neurons;  $p < 2.04 \times 10^{-13}$ ,  
397 hypergeometric test). Similar subtype-specific biases were seen at a subsequent branch point  
398 (Supplementary Fig. 8). These results indicate that although either cell type may engage the  
399 discrete processes represented by each branch in response to sensory manipulation, the cellular  
400 decisions to engage a particular response are biased with respect to L6CThN subtypes.

401 Using the Monocle2 branch expression analysis modeling (BEAM) test, we identified  
402 1392 genes with significant branch-dependent differential expression (Supplementary Table 6;  $q$   
403  $\leq 0.0001$ ; Monocle2 BEAM test); 926 of these overlapped with the 1507 genes with pseudotime-  
404 dependent expression suggesting that discrete cellular responses independently contribute to  
405 the aggregate transcriptional response to altered sensory manipulation. The branch-dependent  
406 genes were organized into seven distinct clusters using hierarchical clustering of the Monocle2  
407 branched model fits (Fig. 8e). Hypergeometric testing demonstrated that neurons that progress  
408 along Branch A (VPM/POM enriched) were enriched for genes associated with engagement of  
409 the proteasome complex, a process involved in synaptic remodeling<sup>51</sup>, while Branch B cells  
410 (VPM-only enriched) were significantly enriched for genes related to the organization of the  
411 postsynaptic density as well as to the regulation of LTP. We identified 79 TFs expressed in a  
412 branch-dependent manner, including 31 TFs not identified in our initial analysis of the aggregate  
413 response (Fig. 8f), suggesting that much of the aggregate L6CThN response induced by altered  
414 sensory inputs is confounded across these two alternative cellular responses. The remaining 27

415 pseudotime-dependent TFs may regulate a uniform response independent of these two  
416 subtype-biased responses. Additional genes regulated in a branch-specific manner included  
417 thirty-two presynaptic genes (Fig. 8g). Furthermore, neurons committing to a Branch A response  
418 demonstrated enhanced expression of GABA receptor subunits (*Gabra5*, *Gabrb1* and *Gabrb2*)  
419 while neurons along Branch B induced ionotropic glutamate receptors (Fig. 8h; *Grin1*, *Grin2b*,  
420 *Grik5*, and *Grin2a*). Taken together, these subtype-specific biases in transcriptional responses  
421 induced by sensory manipulation likely underlie the overall effect we observed on L6CThN  
422 identity, enhancing the distinctions between subtype 1 and subtype 2, and significantly  
423 increasing both the inter- and intra-subtype heterogeneity of L6CThNs.

424

## 425 **DISCUSSION**

426       Using scRNA-seq, we identified two transcriptionally defined subtypes of L6CThNs, each  
427 exhibiting significant bias for particular long-range axonal projection targets. Analysis of gene  
428 expression differences among the profiled neurons determined that variation in axonal  
429 projection pattern, laminar position within the cortex, and neuronal activity state all significantly  
430 contribute to transcriptional identity, and that these properties are at least partially dependent.  
431 Manipulating the activity states of L6CThNs by altering tactile input further showed that each  
432 subtype was biased for particular cellular responses to sensory manipulation, revealing  
433 functional differences among these neurons. These subtype-biased transcriptional responses  
434 not only increased cell-to-cell transcriptional heterogeneity within each subtype, but also  
435 enhanced the transcriptional differences between the two subtypes. Together, these data  
436 identify the most significant influences on the transcriptional identity of individual cortical  
437 projection neurons, and suggest that discrete cellular properties and responses affect the

438 population-level variation and identity of neuronal subtypes.

439           Although it is possible that projection target and transcriptional identity are decoupled  
440 for a minority of neurons, the incomplete segregation of retrograde label across subtypes  
441 observed here likely represents mislabeling of a subset of L6CThNs, as expected due to the close  
442 proximity of VPM and POM and the difficulty of retrogradely labeling all neurons projecting to  
443 adjacent targets. Interestingly, the subtypes identified here share some transcriptional  
444 similarities with two recently defined subtypes in primary visual cortex<sup>12</sup> (Supplementary Fig. 3),  
445 suggesting a conservation of corticothalamic neuron transcriptional identity and axonal  
446 projection target bias across functional regions of the cortex<sup>20</sup>. Future studies will be required to  
447 determine whether VPM-only and LGN-only projecting neurons as well as VPM/POM and  
448 LGN/LP neurons are transcriptionally analogous, and to identify sources of cellular variation  
449 across cortical areas. Although the population of L6CThNs we analyzed is comprised of two  
450 subtypes, profiling a greater number of neurons or profiling at greater depth may reveal  
451 additional rare subtypes of L6CThNs or may show that subtle variations in axonal projection  
452 pattern identified in some anatomical studies are not apparent in the expression profiles of  
453 cortical neurons<sup>20, 21</sup>.

454           Pseudotemporal ordering of the states induced in L6CThN transcriptomes by altered  
455 sensory input assessed over seven days revealed that L6CThNs engage at least two molecularly  
456 distinct responses in a subtype-biased, but not subtype-specific, manner. Although the distinct  
457 transcriptional responses were dominated by neurons collected one and seven days following  
458 whisker manipulation, neurons collected in the baseline state were found throughout  
459 pseudotime, suggesting that individual cortical neurons may engage these plasticity responses in  
460 the non-manipulated state. L6CThNs in the initial phase of cellular response to altered sensory

461 input exhibited similar gene expression changes, indicating that both subtypes engaged a  
462 common initial transcriptional response. These results are consistent with previous studies of  
463 responses induced by neural activity measured over hours across brain regions and between  
464 inhibitory and excitatory neurons which found that common early transcriptional responses lead  
465 to cell-type specific late responses<sup>52,53</sup>.

466         The differential response to sensory manipulation resulted in an increase in the  
467 transcriptional variation across L6CThNs within each subtype as well as a significant  
468 enhancement of the distinction between the subtypes, demonstrating a non-dissociable  
469 relationship between neuronal identity and neuronal activity. Because single L6CThNs have the  
470 potential to engage either transcriptional response regardless of subtype, our data suggest that  
471 extrinsic factors such as distinct activation patterns, due to differences in the circuits in which  
472 each subtype is embedded, induce neurons from a given subtype preferentially toward a similar  
473 response rather than solely cell-autonomous properties. Interestingly, we found that the  
474 transcriptional responses for neurons ipsilateral and contralateral to the sensory manipulation  
475 were similar, suggesting that shared cellular mechanisms underlie the previously described  
476 functional effects ipsilateral and contralateral to unilateral manipulation at timescales similar to  
477 those assessed here<sup>48,54,55</sup>. Furthermore, expression of genes that strongly contributed to  
478 subtype identity such as *Lamp5* was altered in response to sensory manipulation. These data  
479 indicate that factors that change cell state such as plasticity or injury affect our ability to  
480 accurately define discrete, stable transcriptional subtypes.

481         Our results indicate that the transcriptional profiles of cortical neurons reflect specific  
482 features of these cells, but also that the transcriptional variation across individual neurons is a  
483 principal feature of subtype identity with significant functional consequences for individual

484 neuronal responses and subtype function. Subtype 2 L6CThNs were more transcriptionally  
485 heterogeneous than subtype 1 neurons under steady-state conditions in part because of  
486 baseline differences in gene expression associated with neural activity. In addition, the intra-cell  
487 type variation across subtype 2 at day 1 and at day 7 was greater than the inter-cell type  
488 variation at the same time points, suggesting that changes in cell-to-cell variation, rather than  
489 subtype specific differences, dominate the transcriptional responses to experience dependent  
490 plasticity. Together, these data indicate that the contribution of neuronal activity to gene  
491 expression differs across distinct neuronal subtypes and that the transcriptional variation due to  
492 differences in neuronal activity state plays a central role in defining the identity of cortical  
493 projection neurons.

## 494 **METHODS**

### 495 **Mice**

496 All procedures were approved by the Johns Hopkins Animal Care and Use Committee and  
497 followed the guidelines of the Society for Neuroscience and the National Institutes of Health.  
498 Animals used for RNA-sequencing ranged from postnatal day 23 (P23) to P28; animals used for  
499 immunohistochemistry and *in situ* hybridization ranged from P23 to P32. Both males and  
500 females were used in this study (gender indicated for each replicate below). All animals were  
501 kept on a 12 h light/dark cycle, housed with at least two mice per cage and provided with  
502 unlimited water and food. The following mouse lines were used:

503 Neurotensin receptor-1 Cre recombinase line<sup>30</sup> (Ntsr1-Cre, GENSAT 220), loxP-STOP-loxP-  
504 tdTomato Cre reporter lines<sup>56</sup> (Ai9 and Ai14, Allen Institute for Brain Science), loxP-STOP-loxP-  
505 eYFP Cre reporter line<sup>56</sup> (Ai3, Allen Institute for Brain Science), and Pantr1-LacZ<sup>39</sup>. Mice were  
506 maintained on mixed backgrounds including C57BL/6 and CD-1.

507

### 508 **Stereotactic injections**

509 To identify layer 6 corticothalamic neurons (L6CThNs), mice P18 to P23 were anesthetized with  
510 ketamine (50 mg/kg), dexmedetomidine (25 µg/kg) and the inhalation anesthetic, isoflurane.  
511 Animals were placed in a custom-built stereotactic frame and anesthesia was maintained with  
512 isoflurane (1-2.5%). A small craniotomy was performed, and a glass pipette (10–25 µm tip  
513 diameter) was lowered into the thalamus. To identify L6CThNs that project to the ventral  
514 posterior medial nucleus (VPM) of the thalamus, Ntsr1-Cre;tdTomato mice were injected in VPM  
515 (1.1 mm posterior, 1.7 mm lateral, 1.4 mm ventral from bregma) with either Alexa 488 Cholera  
516 toxin B (CTB488, ThermoFisher) or green Retrobeads IX (Lumafluor), and Ntsr1-Cre;YFP mice  
517 were injected with Alexa 555 Cholera toxin B (CTB555, ThermoFisher). To identify L6CThNs that  
518 project to both VPM and to the posterior medial nucleus of the thalamus (POm), Ntsr1-  
519 Cre;tdTomato mice were injected in POm (1.35 mm posterior, 1.23 mm lateral, 3.3 mm ventral  
520 from bregma) with green Retrobeads IX, and Ntsr1-Cre;YFP mice were injected with either  
521 CTB555 or red Retrobeads (Lumafluor). Between 30 and 100 nl of tracer were pressure-injected,  
522 and the pipette was kept in position for 5-10 minutes before removal. Following the injection,  
523 the incision was sutured and buprenorphine (0.05 mg/kg) was administered to all animals  
524 postoperatively. Quantification of the colocalization between retrogradely labeled neurons and  
525 Cre expression in Ntsr1-Cre mice (Fig. 1e,j) was performed on mice injected with either CTB or  
526 Retrobeads. Preliminary experiments indicated that all tracers used generated similar labeling.  
527 However, Retrobeads resulted in increased discrimination of labeled neurons during  
528 Fluorescence Assisted Cell Sorting (FACS) and were therefore used for all FACS experiments.

529

### 530 **Immunohistochemistry**

531 Brains from animals injected with neuronal tracers were removed and placed in a solution of 4%  
532 paraformaldehyde (PFA) in 0.01 M phosphate buffered saline (PBS) for 3 h. Coronal sections  
533 were cut on a vibratome (50 µm, VT-1000S, Leica). Mice expressing YFP were subjected to  
534 immunohistochemistry (1:1000, chicken anti-GFP, GFP-1020, Aves, RRID:AB\_10000240, and  
535 1:300 AlexaFluor 488-conjugated goat anti-chicken, Life Technologies, A11039,  
536 RRID:AB\_10563770). Sections were then mounted using Aqua Poly/Mount mounting medium  
537 (Polysciences, Inc) and visualized on a confocal microscope (LSM 510, Zeiss) using 10x (0.3 NA),  
538 25x (0.8 NA) or 40x (1.3 NA) objectives or on an epifluorescence microscope (AxioObserver.Z1,

539 Zeiss) using a 5x (0.16 NA) objective. Colocalization of tdTomato, YFP and retrograde tracer was  
540 quantified using single-plane confocal images and the Cell Counter plugin in Fiji<sup>57</sup>. For all  
541 anatomical comparisons, upper layer 6 and lower layer 6 were defined as the top 50% and  
542 bottom 50% of the layer defined by Cre-expressing neurons in Ntsr1-Cre mice.

543

#### 544 **Cell isolation and enrichment**

545 For bulk sequencing experiments (bulk RNA-seq), POM was injected with green Retrobeads in  
546 three Ntsr1-cre;tdTomato mice. For single-cell sequencing experiments (scRNA-seq), POM was  
547 injected with red or green Retrobeads in Ntsr1-Cre;YFP mice or in Ntsr1-Cre;tdTomato mice,  
548 respectively. Mice were sacrificed 5-7 days after surgery (Bulk RNA-seq: Replicate 1: P23 female;  
549 Replicate 2: P23 female; Replicate 3: P26 male; scRNA-seq baseline: Replicate 1: P27 male,  
550 Replicate 2: P28 female; scRNA-seq Day 1: Replicate 1: P24 female, Replicate 2: P24 female;  
551 scRNA-seq Day 7: Replicate 1: P29 female, Replicate 2: P27 female). Brains were rapidly  
552 removed and 300  $\mu\text{m}$  thick somatosensory thalamocortical<sup>58</sup> or coronal slices were sectioned  
553 (VT-1200s, Leica) in ice-cold sucrose solution containing the following (in mM): 76 NaCl, 25  
554  $\text{NaHCO}_3$ , 25 glucose, 75 sucrose, 2.5 KCl, 1.25  $\text{NaH}_2\text{PO}_4$ , 0.5  $\text{CaCl}_2$ , 7  $\text{MgSO}_4$ , pH 7.3, 310 mOsm  
555 continuously bubbled with 95%  $\text{O}_2$ /5%  $\text{CO}_2$ . The slices were then placed in a submersion  
556 chamber on an upright microscope in ice-cold sucrose solution continuously bubbled with  
557 95%  $\text{O}_2$ /5%  $\text{CO}_2$ . The barrel cortex was identified using differential interference contrast (DIC)  
558 and epifluorescence microscopy (Axioskop2 FsPlus, Zeiss) using 4x (0.1 NA) and 40x (water  
559 immersion, 0.75 NA) objectives. The location of the retrograde tracer in the lower half of layer 6  
560 was visually confirmed, and then regions of cortex below barrels with appropriate labeling were  
561 microdissected and immediately dropped into 2.6 mL equilibrated Papain DNase-I solution. For  
562 all experiments, at least three consecutive slices confirmed as clearly labeled were  
563 microdissected.

564 The dissociation protocol was adapted from the trehalose-enhanced neuronal isolation  
565 protocol described in Saxena et al, 2012<sup>59</sup> which is based on the Worthington Papain  
566 Dissociation System (Worthington Biochemical Corporation). Briefly, tissue pieces were dropped  
567 into a 5 ml tube containing 2.6 mL of a trehalose-Papain-DNase1 solution which included RNase  
568 inhibitor, incubated 30-45 min at 37°C with gentle trituration at the half way point using a p1000  
569 pipetter. The reaction was stopped by adding a protease inhibitor solution (for solution  
570 compositions, see Saxena et al, 2012<sup>59</sup>). The tissue was then further dissociated and washed by  
571 sequential pipetting and low-speed centrifugations. The final pellet was resuspended in 200  $\mu\text{L}$   
572 of media (DMEM, 5% trehalose (w/v), 25  $\mu\text{M}$  AP-V, 0.4 mM kynurenic acid, 6  $\mu\text{L}$  of 40 U/ $\mu\text{L}$   
573 RNase inhibitor) at room temperature and introduced into a FACS machine (Beckman Coulter  
574 MoFlo Cell Sorter). Neurons were sorted based on their fluorescence (either tdTomato-positive  
575 (red) and Retrobead-positive (green) versus tdTomato-positive only or YFP-positive (green) and  
576 Retrobead-positive (red) versus YFP-positive only) directly into lysis buffer either in eppendorf  
577 tubes for bulk sequencing (350  $\mu\text{L}$  lysis buffer, Qiagen RNeasy Micro Kit; Replicate 1: tdTomato-  
578 only: 1943 cells, tdTomato and tracer: 2287 cells; Replicate 2: tdTomato-only: 386, tdTomato  
579 and tracer: 782; Replicate 3: tdTomato-only: 604, tdTomato and tracer: 934) or into individual  
580 wells of 96-well plates for single-cell sequencing (2  $\mu\text{L}$  Smart-Seq2 lysis buffer + RNAase  
581 inhibitor, 1  $\mu\text{L}$  oligo-dT primer, and 1  $\mu\text{L}$  dNTPs according to Picelli et al, 2014<sup>60</sup>). Upon  
582 completion of a sort, the plates were briefly spun in a tabletop microcentrifuge and immediately  
583 placed on dry ice. Single-cell lysates were subsequently kept at -80°C until cDNA conversion.  
584



## 585 **Library preparation and amplification**

586 For bulk samples, RNA was extracted with a Qiagen RNeasy Micro Kit. RNA quality was assessed  
587 with the Bioanalyzer Pico RNA kit and samples had RIN scores of 8.2-8.8. Library preparation and  
588 amplification were performed according to the Smart-Seq2 protocol<sup>60</sup> with some modifications.  
589 Principally, all primer and adapter sequences were synthesized with a 5'-biotin to minimize  
590 primer dimerization. Briefly, 200 pg of RNA per sample were used as input for template  
591 switching cDNA synthesis. Full-length cDNA was amplified by KAPA HiFi mediated PCR for 20  
592 cycles using a 5'-biotinylated ISPCR primer. Then, 500 pg of Ampure XP bead cleaned (1:1) cDNA  
593 was used as input for a standard Nextera XT tagmentation reaction, and amplification of  
594 adapter-ligated fragments was carried out for 12 cycles during which individual index sequences  
595 were added to each distinct sample. Library concentration was assessed with Qubit and library  
596 fragment size distribution was assessed on the Agilent Bioanalyzer. Pooled, indexed bulk RNA-  
597 seq samples were initially sequenced on the Illumina MiSeq 500 platform, and subsequently the  
598 same pool was sequenced on one lane of the Illumina HiSeq 2500 platform to produce 50 bp  
599 paired-end reads. Libraries were sequenced to an average depth of  $4.2 \times 10^7$  fragments each.  
600 Reads from both runs were aggregated by index prior to mapping.

601 Library preparation and amplification of single-cell samples was performed using a  
602 modified version of the Smart-Seq2 protocol. Briefly, 96-well plates of single-cell lysates were  
603 thawed to 4°C, heated to 72°C for 3 minutes, and then immediately placed on ice. Template  
604 switching first-strand cDNA synthesis was performed as described above using a 5'-biotinylated  
605 TSO oligo. cDNAs were amplified using 18 cycles of KAPA HiFi PCR and 5'-biotinylated ISPCR  
606 primer. Amplified cDNA was cleaned with a 1:1 ratio of Ampure XP beads and 300 pg was used  
607 for a one-half standard-sized Nextera XT tagmentation reaction. Tagmented fragments were  
608 amplified for 12 cycles and dual indexes were added to each well to uniquely label each library.  
609 Concentrations were assessed with Quant-iT PicoGreen dsDNA Reagent (Invitrogen) and  
610 samples were diluted to ~2 nM and pooled. Pooled libraries were sequenced on the Illumina  
611 HiSeq 2500 platform to a target mean depth of  $\sim 8.0 \times 10^5$  50 bp paired end fragments per cell<sup>61</sup>  
612 at the Hopkins Genetics Research Core Facility to generate 50 bp paired-end reads.

613

## 614 ***In situ* hybridization and immunohistochemistry**

615 Immunohistochemistry (IHC) for tdTomato and *in situ* hybridization (ISH) for *linc-Tmem20* were  
616 combined to show co-localization of the lincRNA transcript and tdTomato protein in L6CThNs.  
617 Ntsr1-Cre;tdTomato mice (P23 to P30) were transcardially perfused with 0.1 M PBS followed by  
618 a 4% PFA solution, and brains were post-fixed for 3 h at room temperature in 4% PFA. Then, 30  
619  $\mu\text{m}$  sections were cut on a vibratome (VT-1000S, Leica) and first processed for IHC (1:1000,  
620 Rabbit anti-DsRed polyclonal antibody, Living Colors, Clontech Laboratories, RRID: AB\_10013483  
621 and 1:300 AlexaFluor 568-conjugated goat anti-rabbit, Life Technologies, A11011, RRID:  
622 AB\_143157). Next, the sections were processed for ISH following the protocol described in  
623 Blackshaw, 2013<sup>62</sup> without proteinase K treatment. Sections were incubated overnight at 65°C  
624 with 5 ng/ $\mu\text{L}$  of an anti-sense *linc-Tmem20* DIG labeled probe (DIG RNA labeling Kit (SP6/T7),  
625 Roche). Detection of the hybridized DIG probes was performed using an alkaline phosphatase  
626 (AP) conjugated antibody (1:1000, Anti-Digoxigenin [21H8] Alkaline Phosphatase, Abcam, Cat.  
627 No.: ab119345, RRID:AB\_10901703) followed by application of the AP substrate BCIP/NBT  
628 (SigmaFast BCIP/NBT, Sigma-Aldrich). The enzymatic reaction was carried out until the desired  
629 signal to noise ratio was observed. Images were then taken on an AxioObserver.Z1 (Zeiss) using

630 a combination of epifluorescence and brightfield imaging (10x objective, NA: 0.3). Brightness  
631 and contrast were adjusted using Adobe Photoshop (Adobe Systems Incorporated).

632 For validation of *Pantr1* expression, transgenic mice expressing LacZ driven by the  
633 endogenous *Pantr1* promoter locus<sup>39, 63</sup> were injected with CTB488 in VPM and CTB555 in POM.  
634 IHC was performed on 50  $\mu$ m-thick sections (rabbit anti- $\beta$  galactosidase antibody 1:5000; a kind  
635 gift from Dr. Joshua R. Sanes, Harvard University, Cambridge, MA and 1:300 AlexaFluor 647-  
636 conjugated donkey anti-rabbit, Life Technologies, A31573, RRID: AB\_2536183). Imaging was  
637 performed on a confocal microscope (LSM 510, Zeiss) using 10x (0.3 NA), 25x (0.8 NA) or 40x  
638 (1.3 NA) objectives. LacZ-positive and retrogradely labeled neurons were manually counted on  
639 single-plane confocal images using the Cell Counter plugin in Fiji<sup>57</sup>. Brightness and contrast were  
640 adjusted using Adobe Photoshop (Adobe Systems Incorporated).

641 For detection of single mRNA molecules, we used the commercially available system  
642 RNAscope (ACDbio). *Ntsr1-Cre;tdTomato* mice (P23 to P30) were transcardially perfused with  
643 0.1 M PBS followed by a 4% PFA solution, and brains were post-fixed for 2 h at room  
644 temperature in 4% PFA. Fixed brains were then washed in PBS and allowed to equilibrate in a  
645 30% sucrose-PBS solution for 36 h before being embedded and frozen in OCT compound  
646 (Scigen, Tissue-Plus #4583). Frozen brains were kept at -80°C for up to 2 months. 20  $\mu$ m sections  
647 were collected on a cryostat (Leica CM3050) and processed according to instructions provided  
648 by RNAscope. The following probes were used: tdTomato-C2 (317041-C2), tdTomato-C3 (  
649 317041-C3), Mm-Rbfox3 (313311), Rbfox3-C2 (313311-C2), Mm-Lamp5 (451071), Mm-Pantr1  
650 (483711), Mm-Serpini1 (501441), Gabra5-C3 (319481-C3). Imaging was performed on a confocal  
651 microscope (LSM 510, Zeiss) using a 63x objective (NA 1.4). Sections from three animals were  
652 used for *Pantr1*, *Lamp5* and *Gabra5* and from four animals for *Serpini1*. For quantification of the  
653 number of mRNAs per neuron obtained using RNAscope, single plane images were first  
654 processed with the open-source software CellProfiler (Broad Institute) to automatically identify  
655 individual cells based on DAPI signal and to generate outline files. These outlines were then used  
656 as input, in combination with the corresponding confocal images, into FISH-quant<sup>64</sup> (Matlab) for  
657 quantification of transcript number per cell. Cells with no detectable NeuN (*Rbfox3*) transcript  
658 were discounted as non-neuronal cells. A threshold of 20 *tdTomato* puncta was selected as the  
659 cutoff for distinguishing tdTomato-positive from tdTomato-negative neurons. This resulted in  
660 164 tdTomato-positive and 188 tdTomato-negative neurons for *Serpini1*, 118 tdTomato-positive  
661 and 150 tdTomato-negative neurons for *Lamp5*, 111 tdTomato-positive and 198 tdTomato-  
662 negative neurons for *Pantr1*, and 135 tdTomato-positive and 160 tdTomato-negative  
663 neurons for *Gabra5*. Individual images were stitched to reconstitute an image spanning layer 6  
664 vertically, and the distance of each neuron from the bottom of the layer was measured manually  
665 using Fiji<sup>57</sup> and normalized to the height of layer 6. Statistical testing (Likelihood ratio test) and  
666 curve fitting (Loess) was performed in R/Bioconductor.

667

### 668 **Sensory manipulation**

669 Prior to sensory manipulation, animals were bilaterally injected in POM with green Retrobeads  
670 IX (Lumafuor) as described above. To induce experience dependent plasticity, mice (P18 to P23)  
671 were anesthetized with the inhalation anesthetic, isoflurane. Once an adequate level of  
672 anesthesia was achieved, the animals were placed under a surgical microscope and, using  
673 tweezers, individual vibrissae were gently pulled by applying slow, steady tension to the base of  
674 the whisker<sup>65</sup>. To produce a chessboard pattern, vibrissae alpha, gamma, A2, A4, B1, B3, C2, C4,  
675 C6, D1, D3, D5, D7, E1, E3, E5 and E7 were pulled unilaterally while the rest remained

676 untouched. Following the procedure, the animals were returned to their home cage and housed  
677 with at least one other animal until tissue collection. We checked for regrowing vibrissae every  
678 two days and removed them if visible.

679

### 680 **Read pre-processing**

681 For both bulk and single-cell libraries, paired-end reads were aligned to the mouse reference  
682 genome (mm10) using Hisat2<sup>66</sup> with the default parameters except: -p 8. Aligned reads from  
683 individual samples were quantified against a reference transcriptome<sup>61</sup> (GENCODE vM8)  
684 supplemented with additional lncRNA genes described previously<sup>8</sup> (Supplementary File S1) with  
685 cuffquant<sup>67</sup> using default parameters with the following exceptions: --no-update-check -p 8. For  
686 bulk RNA-Seq, pre-processed expression estimates were used as input for cuffdiff using default  
687 parameters except: -p 16, and the output of cuffdiff was analyzed using the cummeRbund  
688 R/Bioconductor package<sup>68</sup>. For single-cell experiments, normalized expression estimates across  
689 all samples were obtained using cuffnorm with default parameters. For comparison to results  
690 from primary visual cortex<sup>12</sup>, raw reads were downloaded from the short read archive  
691 (GSE71585), processed as described above for single-cell samples, and normalized expression  
692 estimates were obtained from combining both sources of single-cell reads together via  
693 cuffnorm.

694

### 695 **Single-cell analysis**

696 The normalized FPKM matrix from cuffnorm was used as input for the Monocle2 single-cell RNA-  
697 seq framework<sup>69</sup> in R/Bioconductor<sup>70</sup>. Relative FPKM values for each cell were converted to  
698 estimates of absolute mRNA counts per cell (RPC) using the Monocle2 census utility. A total of  
699 346 individual cells under baseline conditions passed quality filters including: a) total mRNAs  
700 between 2000 and 200,000 per cell, and b) >10,000 fragments mapped (total\_mass). 12,537  
701 genes were identified as expressed in at least 15 cells across all conditions.

702 To identify high-variance genes, a generalized additive model<sup>71</sup> (MGCV R package) was  
703 fit to the log<sub>2</sub> mean RPC expression versus a cubic spline fit to the log<sub>2</sub> coefficient of  
704 variation(BCV) for each replicate dissociation independently (Supplementary Fig. 2a and Fig. 7d).  
705 The intersection of genes with residuals to this fit greater than 1.0 from each replicate were  
706 chosen as 'high-variance' genes and the log<sub>2</sub> expression estimates (with a pseudocount of 1) of  
707 these selected genes were used as input for PCA analysis and t-stochastic nearest neighbor  
708 embedding (tSNE) clustering of individual cells<sup>72</sup>.

709 To cluster individual cells, we employed a spectral tSNE approach<sup>73</sup>, combining non-  
710 linear dimensional reduction and density clustering. Briefly, PCA analysis was conducted on  
711 high-variance genes and then a subset of components (n = 3, selected by permutation parallel  
712 analysis, Supplementary Fig. 2b) were used as input for the tSNE visualization algorithm<sup>72</sup>  
713 (perplexity = 30). K-means clustering was used to partition cells using the two reduced tSNE  
714 dimensions into two discrete subtypes. The choice of k was made using 1000 bootstrapped tSNE  
715 estimates and evaluating k = 2 through k = 8 for each round. The average silhouette coefficient  
716 for each tSNE\*k was determined and the mean and standard deviation of these estimates was  
717 estimated for each k (Supplementary Fig. 2c). k = 2 was chosen as the k value with the highest  
718 average silhouette coefficient and the lowest value of k for which there was no significant  
719 improvement in mean silhouette score.

720 After cluster assignment, differential expression testing was performed across all  
721 expressed genes using the Monocle2 VGAM model comparison test<sup>69</sup>. To test for differentially

722 expressed genes between transcriptionally-defined cell types, the following full model was fit to  
723 each expressed gene:  $\sim$ replicate+num\_genes\_expressed+celltype, and compared to a reduced  
724 model in which celltype was removed. The number of genes expressed in each cell was included  
725 as an explanatory variable as a proxy for the sensitivity of scRNA-seq in each individual cell. To  
726 test for differentially expressed genes between anatomically labeled cells, the following full  
727 model was fit to each expressed gene:  $\sim$ replicate+num\_genes\_expressed+label, and compared  
728 to a reduced model in which label was removed. In both cases, genes were selected as  
729 significantly differentially expressed with a 0.1% false discovery rate (Monocle2 test; Benjamini-  
730 Hochberg corrected). DE gene lists were tested for gene set enrichment against Gene  
731 Ontology and Reactome genesets<sup>74,75</sup> using the clusterProfiler Bioconductor package<sup>76</sup>. The  
732 heatmap of differentially expressed genes was composed using the pheatmap R package<sup>77</sup> and  
733 dendrograms were generated from the hierarchical clustering of the Euclidean distances  
734 between points.

735 To identify gene sets contributing to transcriptional identity in our single-cell dataset,  
736 gene-centric PCA was performed on a mean-centered matrix of variance-stabilized expression  
737 estimates for high-variance genes across all cells. The resulting rotations were used to project  
738 all expressed genes into the same PCA space to identify their weights. These weights were used  
739 to rank-order all expressed genes and this ordering was used as input for a pre-ranked GSEA  
740 analysis<sup>78</sup>. Gene sets for the GSEA analysis were derived from the Monocle2 differential gene  
741 tests described above or from our curated list of neuronal activity genes<sup>43-46</sup> using their adjusted  
742 p-value cutoff of  $p < 0.01$  (Supplementary Table 4).

743

#### 744 **WGCNA**

745 To identify modules of correlated gene expression we used the Weighted Gene Correlation  
746 Network Analysis package WGCNA<sup>42</sup>. Normalized expression data were first batch-corrected  
747 with respect to replicates using limma, and the resulting matrix of 12,537 detectably expressed  
748 genes and 346 cells was used as input for WGCNA. Cells were hierarchically clustered using the  
749 Jensen-Shannon distance with average linkage. A soft threshold power of 11 was used to create  
750 a signed Topological overlap matrix directly from the normalized and batch-corrected  
751 expression estimates. Modules were then learned with a minimum module size of 30. Modules  
752 were merged below a distance threshold of 0.5. Module eigenvalues were estimated and  
753 correlated with cellular traits using the Pearson product moment correlation test. Module gene  
754 membership was determined in a similar manner in which individual gene expression estimates  
755 were correlated with module eigenvalues and tested for significance. To test the effect of each  
756 module on the segregation of L6CThN cell types, each module eigenvalue was separately  
757 regressed out of the expression matrix using limma, and subsequent values were used as input  
758 for a tSNE using identical parameters to the original assay.

759

#### 760 **Pseudotime and BEAM analyses**

761 Pseudotemporal ordering was performed using the prescribed Monocle2 workflow. Briefly, all  
762 1023 L6CThNs passing quality controls were used as input. To reconstruct a trajectory that  
763 reflected cellular progression in response to altered sensory input, we first performed a  
764 differential test to identify genes whose expression changed as a function of collection day,  
765 independent of baseline differences between celltype (fullModelFormulaStr =  
766 " $\sim$ num\_genes\_expressed+Total\_mRNAs+sex+celltype\*Day, reducedModelFormulaStr = "  
767 " $\sim$ num\_genes\_expressed+Total\_mRNAs+sex+celltype",  $q \leq 0.01$ ). These 1134 genes were used as

768 a filtering set for the DDRTree dimensionality reduction. Cells were tested for differential  
769 expression along pseudotime using the following model comparisons with  $q \leq 0.0000001$ :  
770 fullModelFormulaStr = "~num\_genes\_expressed+celltype+sm.ns(Pseudotime,df=3)",  
771 reducedModelFormulaStr = "~num\_genes\_expressed+celltype". Branch dependent expression  
772 was determined using the Monocle2 BEAM test (fullModelFormulaStr =  
773 "~num\_genes\_expressed+celltype+sm.ns(Pseudotime, df =  
774 3)\*Branch",reducedModelFormulaStr = "~num\_genes\_expressed+celltype+sm.ns(Pseudotime,  
775 df = 3)",  $q \leq 0.0001$ ). All significant gene lists were tested for gene set enrichment using the  
776 hypergeometric test.

777

#### 778 **Data and software availability**

779 All primary data are archived on the SRA and Gene Expression Omnibus and are available for  
780 direct download on our companion website  
781 ([http://rstudio.gofflab.org:8383/apps/L6CthPN\\_dash/](http://rstudio.gofflab.org:8383/apps/L6CthPN_dash/)). Source code and software tools are  
782 available upon request.

783

784 **Author Contributions:** MC, SPB and LAG conceived the experiments. MC, JDR, and GHC  
785 performed all experiments. MC, SPB and LAG analyzed the data and wrote the paper with input  
786 from all authors.

787

788 **Conflict of Interest:** The authors declare no competing financial interests.

789

790 **Acknowledgments:** We thank Hao Zhang and the Johns Hopkins Bloomberg School of Public  
791 Health Flow Cytometry and Cell Sorting Core Facility. Sequencing service was provided by the  
792 Johns Hopkins Genetic Resources Core Facility. We thank Dr. Joshua R. Sanes, Harvard  
793 University, for the anti-LacZ antibody and Dr. Jesse Gray, Harvard Medical School, for the  
794 curated list of neuronal activity-induced genes. This work was supported by a Klingenstein-  
795 Simons Fellowship (SPB), a Johns Hopkins Science of Learning Grant (SPB, LAG), National Science  
796 Foundation Grant 1656592 (SPB, LAG), NIH training grant T32 GM07814 (JDR), a Boehringer-  
797 Ingelheim Fonds Fellowship (MC), and the NINDS (NS050274).

798

799

800

801

802

#### 803 **REFERENCES**

804

805

806

807 **FIGURE LEGENDS**

808 **Figure 1: Layer 6 corticothalamic neuron subclasses distinguished by their axonal projections**

809 **have distinct gene expression profiles. (a, f)** The labeling schemes for two classes of layer 6  
810 corticothalamic neurons (L6CThNs; VPM: Ventral posterior medial nucleus; POm: Posterior  
811 medial nucleus). **(b)** Injection of a retrograde tracer (red, Alexa 555-Cholera toxin B) into VPM in  
812 an Ntsr1-Cre;YFP mouse. Low **(c)** and high **(d)** magnification images of layer 6 (L6) of barrel  
813 cortex (BC) showing colocalization of the retrograde tracer (red) and YFP (green). **(e)**  
814 Quantification of the colocalization (mean±SE; n=4 mice). **(g)** Injection of a retrograde tracer  
815 (red) in POm of an Ntsr1-Cre;YFP mouse. Low **(h)** and high **(i)** magnification images of BC  
816 showing the colocalization of the tracer to CThNs in lower L6. **(j)** Quantification of the  
817 colocalization (mean±SE; n=3 mice). **(k)** Matrix showing the 69 genes differentially expressed  
818 between pools of VPM/POm and VPM-only L6CThNs from three replicates. Scale bars, **(b,g)** 500  
819 μm; **(c,h)** 50 μm; and **(d,i)** 10 μm.

820

821 **Figure 2: Unbiased clustering of single transcriptomes of layer 6 corticothalamic neurons**

822 **defines two subtypes with strong axonal projection bias. (a)** tSNE plot showing two subtypes of  
823 layer 6 corticothalamic neurons (L6CThNs) identified through unbiased clustering of single  
824 L6CThN transcriptomes. **(b)** Same tSNE plot as in **(a)**, with each L6CThN color-coded by its axonal  
825 projection label. **(c)** Fraction of VPM-only (green) and VPM/POm (red) L6CThNs in each  
826 transcriptionally defined subtype for each replicate. **(d)** Matrix showing the hierarchical  
827 clustering of the 346 individual L6CThNs (x-axis) and the 286 genes differentially expressed (DE)  
828 between the two subtypes (y-axis, 0.1 % FDR). **(e)** tSNE plots showing the normalized expression  
829 levels of two differentially expressed genes enriched in subtype 1 (*Fxyd6*, left) or subtype 2

830 (*Lamp5*, right). **(f)** tSNE plots showing the normalized expression levels of two differentially  
831 expressed long-noncoding RNAs enriched in subtype 1 (*linc-Tmem20*, left) or subtype 2 (*Pantr1*,  
832 right). **(g)** Low magnification image of *linc-Tmem20* (red) in barrel cortex of an *Ntsr1*-  
833 *Cre*;tdTomato (green) mouse using a combination of *in situ* hybridization (*linc-Tmem20*) and  
834 immunohistochemistry (tdTomato). Insets show higher expression of *linc-Tmem20* in L6CThNs in  
835 lower layer 6 (L6, Inset 2) relative to upper L6 (Inset 1). **(h)** LacZ expression in barrel cortex of a  
836 heterozygous *Pantr1-LacZ* mouse following injections of green retrograde tracer in VPM and red  
837 tracer in POm. Insets show puncta of LacZ in VPM-only L6CThNs (Column 1, green) and not in  
838 VPM/POm L6CThNs (Column 2, red and green L6CThNs). **(i)** Barplot showing the fraction of  
839 VPM-only and VPM/POm L6CThNs expressing LacZ (mean $\pm$ SE; n=3 mice). **(j)** Boxplot of the  
840 median number of genes detected across all cells for each subtype by replicate pair. (Replicate  
841 1: Median number of genes detected: Subtype 1: 5582  $\pm$  526.3 (sd), Subtype 2: 5080  $\pm$  650.0  
842 (sd),  $p < 2.169 \times 10^{-10}$ , Mann-Whitney test; Replicate 2: Median number of genes detected:  
843 Subtype 1: 6950  $\pm$  545.4 (sd), Subtype 2: 6569  $\pm$  478.7 (sd),  $p < 7.071 \times 10^{-7}$ , Mann-Whitney test).  
844 **(k)** Cumulative probability distribution of the pairwise Euclidean distances among cells in  
845 subtype 1 (gold) and subtype 2 (blue) ( $p < 2.2 \times 10^{-16}$ , Welch's two-sample t-test). The black line  
846 represents the pairwise distances among a random sample of 100 cells drawn from the 346  
847 cells. 95% confidence interval is shown in light grey (Dvoretzky-Kiefer-Wolfowitz inequality).  
848 Scale bars, **(g)** 100  $\mu$ m, 20  $\mu$ m; **(h)** 20  $\mu$ m, 5  $\mu$ m.

849

850 **Figure 3: Coordinately regulated gene sets contribute to the transcriptional identities of layer**  
851 **6 corticothalamic neuron subtypes.** **(a)** Weighted gene co-expression network analysis  
852 (WGCNA) on variance-stabilized gene expression estimates identifies modules of coordinately

853 regulated genes, which are grouped using hierarchical clustering of module eigengenes. **(b)**  
854 Pearson correlation of each module eigengene with parameters for both transcriptional subtype  
855 and label. Significance of each correlation was determined (\*) using the Pearson's product  
856 moment test ( $p < 0.01$ ; Benjamini-Hochberg corrected). **(c)** Pearson correlation of each module  
857 eigengene with component rotations for principal components 1-5. **(d,e)** Hypergeometric test  
858 for enrichment of the 286 genes differentially expressed between transcriptionally defined  
859 L6CThN subtypes **(d)** and genes associated with neuronal activity **(e)** within each module ( $p <$   
860  $0.01$ ; Benjamini-Hochberg corrected).

861

862 **Figure 4: Variation in the transcriptional profiles of layer 6 corticothalamic neurons is defined**

863 **by both subtype-specific genes and genes reflecting laminar location within layer 6. (a,d) tSNE**

864 plots showing the eigenvalue for each cell for the two WGCNA modules most correlated with

865 the first principal component **(a, Midnight Blue; d, Turquoise)**. **(b,c,e,f)** Gene expression tSNE

866 plots (*left*) showing the normalized gene expression level in each cell for representative genes

867 with significant weights on PC1. **(b)** and **(c)** are representative members of the Midnight Blue

868 module, and **(e)** and **(f)** belong to the Turquoise module. Single molecule fluorescence *in situ*

869 hybridization (smFISH, *middle*) showing images of mRNAs detected for each gene of interest

870 (magenta), tdTomato (green), NeuN (cyan), and DAPI (blue) in layer 6 of Ntsr1-Cre;tdTomato

871 mice. Quantitative gene expression analysis of smFISH (*right*) showing the number of mRNAs

872 expressed per neuron as a function of normalized vertical position in layer 6 and neuronal cell

873 type (L6CThNs: Ntsr1;tdTomato-positive;NeuN-positive neurons in green and non-L6CThNs:

874 Ntsr1;tdTomato-negative, NeuN-positive neurons in grey). Curves represent Loess fits to the

875 individual data points, grouped by cell type, and shaded areas correspond to 95% confidence



876 intervals. Statistics: **(b, Lamp5)** "Subtype specific"  $p < 7.3231 \times 10^{-19}$ ; "CThN+ position specific"  $p$   
877  $< 1.175 \times 10^{-17}$ ; "CThN- position specific"  $p < 0.0035$ ; **(c, Pantr1)** "Subtype specific"  $p < 0.9931$ ;  
878 "CThN+ position specific"  $p < 9.243 \times 10^{-11}$ ; "CThN- position specific"  $p < 1.021 \times 10^{-14}$ ; **(e,**  
879 *Serpini1*) "Subtype specific"  $p < 1.606 \times 10^{-06}$ ; "CThN+ position specific"  $p < 1.045 \times 10^{-06}$ ; "CThN-  
880 position specific"  $p < 0.3342$ ; **(f, Gabra5)** "Subtype specific"  $p < 0.1020$ ; "CThN+ position  
881 specific"  $p < 1.994 \times 10^{-3}$ ; "CThN- position specific"  $p < 0.09873$ .

882

883 **Figure 5: A signature of neuronal activity significantly contributes to the transcriptional**  
884 **identities of layer 6 corticothalamic neuron subtypes.** **(a)** Module eigengenes for the four  
885 modules with significant enrichment for genes associated with neuronal activity. **(b,c)** tSNE plots  
886 showing the discretized expression of genes with the highest **(b)** and second highest **(c)** weights  
887 in each direction of PC1. **(d,e)** tSNE plots showing the discretized expression of genes with the  
888 highest **(d)** and second highest **(e)** weights in each direction of PC2. **(f,g)** tSNE plots showing the  
889 discretized expression levels of four genes reflecting neuronal activity: *Bdnf* and *Camk2n1* **(f)**,  
890 and *Fos* and *Plk5* **(g)**.

891

892 **Figure 6: Sustained modulation of gene expression after sensory manipulation in layer 6**  
893 **corticothalamic neurons.** **(a)** Experimental design for sensory manipulation and single-cell  
894 transcriptional analysis of L6CThNs from the barrel cortex at 1 and 7 days post manipulation. **(b)**  
895 tSNE plot of all 1023 neurons obtained from baseline (Day 0), 1, and 7 days following sensory  
896 manipulation using the 286 genes identified as differentially expressed between L6CThN  
897 subtypes at day 0. Day 0 neurons are labeled by transcriptional subtype. Day 1 and Day 7  
898 neurons are colored light gray. tSNE positions were fit to a Gaussian mixture model (black lines)

899 which was used to classify Day 1 and Day 7 neurons as members of the previously defined  
900 L6CThN transcriptional subtypes. (c) tSNE plot colored by transcriptional subtype as assigned in  
901 (b). 10 of 340 neurons (2.9%) from Day 0 were assigned to a different subtype than in **Fig. 2a**  
902 and are labeled light green. (d) tSNE plot with neurons colored by projection label. (e) k-means  
903 clustering analysis of mean-centered gene expression, aggregated by Day and transcriptional  
904 subtype (Subtype 1: gold; Subtype 2: blue) for genes with significant differential expression after  
905 sensory manipulation. Semi-transparent lines represent individual genes and bold lines  
906 represent cluster centroids.

907

908 **Figure 7: Pseudotemporal reconstruction of transcriptional responses to sensory manipulation**

909 **in layer 6 corticothalamic neurons.** (a) Discriminative dimensionality reduction projection of  
910 1023 L6CThNs using genes identified as significantly differentially expressed after sensory  
911 manipulation. Neurons are colored by day relative to manipulation. (b) Density distribution of  
912 L6CThNs across pseudotime, grouped by day following manipulation. (c) Heatmap of normalized  
913 response curves for the 1507 genes with significant differential expression across pseudotime,  
914 and significantly enriched gene sets identified for each cluster ( $p < 1.0 \times 10^{-2}$ , hypergeometric  
915 test).

916

917 **Figure 8: Sensory manipulation induces distinct cellular responses in layer 6 corticothalamic**

918 **neurons biased with respect to transcriptional subtype.** (a) Distribution of the pairwise  
919 Euclidean distances within each subtype for subtype 1 (*left*, gold) and subtype 2 (*right*, blue),  
920 using variance-stabilized expression estimates for all expressed genes, showing a significant  
921 increase in heterogeneity of gene expression for both subtype 1 and subtype 2. (b) Distribution

922 of pairwise inter-subtype Euclidean distances between transcriptionally defined L6CThN  
923 subtypes across all expressed genes plotted for each day following sensory manipulation. There  
924 is a significant divergence between these two subtypes across time points as indicated by a  
925 positive shift in the distances after induction of experience-dependent plasticity. (c) Density  
926 distributions of L6CThNs at each day plotted across pseudotime for the two transcriptional  
927 subtypes of L6CThNs. (d) Discriminative dimensionality reduction projection of 1023 L6CThNs  
928 shown in **Fig. 7a**, now colored by transcriptional subtype. Red and blue arrows indicate the first  
929 major cellular response branch point following sensory manipulation. Grey arrow indicates the  
930 tree root state and direction of response progression. Pie charts indicate the proportion of each  
931 subtype in the population for each branch. (e) BEAM analyses of gene sets with significant  
932 differential expression dependent on either major branch point showing all significant DE genes.  
933 (f-h) BEAM heatmap for branch-dependent transcription factors not detected in the aggregate  
934 pseudotime response (f), presynaptic proteins (g), and ligand-gated neurotransmitter receptors  
935 (h).

936

937 **SUPPLEMENTARY INFORMATION** (provided separately)

938

939     **REFERENCES**

- 940     1. Junker, J.P. & van Oudenaarden, A. Every cell is special: genome-wide studies add a new  
941         dimension to single-cell biology. *Cell* **157**, 8-11 (2014).
- 942     2. Liu, S. & Trapnell, C. Single-cell transcriptome sequencing: recent advances and remaining  
943         challenges. *F1000Res* **5**, 182 (2016).
- 944     3. Molyneaux, B.J., Arlotta, P., Menezes, J.R. & Macklis, J.D. Neuronal subtype specification in  
945         the cerebral cortex. *Nat Rev Neurosci* **8**, 427-437 (2007).
- 946     4. West, A.E. & Greenberg, M.E. Neuronal activity-regulated gene transcription in synapse  
947         development and cognitive function. *Cold Spring Harb Perspect Biol* **3** (2011).
- 948     5. Lyons, M.R. & West, A.E. Mechanisms of specificity in neuronal activity-regulated gene  
949         transcription. *Prog Neurobiol* **94**, 259-295 (2011).
- 950     6. Flavell, S.W. & Greenberg, M.E. Signaling mechanisms linking neuronal activity to gene  
951         expression and plasticity of the nervous system. *Annu Rev Neurosci* **31**, 563-590 (2008).
- 952     7. Greig, L.C., Woodworth, M.B., Galazo, M.J., Padmanabhan, H. & Macklis, J.D. Molecular logic  
953         of neocortical projection neuron specification, development and diversity. *Nat Rev Neurosci*  
954         **14**, 755-769 (2013).
- 955     8. Molyneaux, B.J., *et al.* DeCoN: genome-wide analysis of in vivo transcriptional dynamics  
956         during pyramidal neuron fate selection in neocortex. *Neuron* **85**, 275-288 (2015).
- 957     9. Darmanis, S., *et al.* A survey of human brain transcriptome diversity at the single cell level.  
958         *Proc Natl Acad Sci U S A* **112**, 7285-7290 (2015).
- 959     10. Lake, B.B., *et al.* Neuronal subtypes and diversity revealed by single-nucleus RNA sequencing  
960         of the human brain. *Science* **352**, 1586-1590 (2016).
- 961     11. Pollen, A.A., *et al.* Low-coverage single-cell mRNA sequencing reveals cellular heterogeneity

- 962 and activated signaling pathways in developing cerebral cortex. *Nat Biotechnol* **32**, 1053-  
963 1058 (2014).
- 964 12. Tasic, B., *et al.* Adult mouse cortical cell taxonomy revealed by single cell transcriptomics.  
965 *Nat Neurosci* **19**, 335-346 (2016).
- 966 13. Zeisel, A., *et al.* Brain structure. Cell types in the mouse cortex and hippocampus revealed by  
967 single-cell RNA-seq. *Science* **347**, 1138-1142 (2015).
- 968 14. Hevner, R.F., *et al.* Beyond laminar fate: toward a molecular classification of cortical  
969 projection/pyramidal neurons. *Dev Neurosci* **25**, 139-151 (2003).
- 970 15. Sugino, K., *et al.* Molecular taxonomy of major neuronal classes in the adult mouse  
971 forebrain. *Nat Neurosci* **9**, 99-107 (2006).
- 972 16. Sorensen, S.A., *et al.* Correlated gene expression and target specificity demonstrate  
973 excitatory projection neuron diversity. *Cereb Cortex* **25**, 433-449 (2015).
- 974 17. Sanes, J.R. & Masland, R.H. The types of retinal ganglion cells: current status and  
975 implications for neuronal classification. *Annu Rev Neurosci* **38**, 221-246 (2015).
- 976 18. Wagner, A., Regev, A. & Yosef, N. Revealing the vectors of cellular identity with single-cell  
977 genomics. *Nat Biotechnol* **34**, 1145-1160 (2016).
- 978 19. Dueck, H., Eberwine, J. & Kim, J. Variation is function: Are single cell differences functionally  
979 important?: Testing the hypothesis that single cell variation is required for aggregate  
980 function. *Bioessays* **38**, 172-180 (2016).
- 981 20. Bourassa, J. & Deschenes, M. Corticothalamic projections from the primary visual cortex in  
982 rats: a single fiber study using biocytin as an anterograde tracer. *Neuroscience* **66**, 253-263  
983 (1995).
- 984 21. Bourassa, J., Pinault, D. & Deschenes, M. Corticothalamic projections from the cortical barrel

- 985 field to the somatosensory thalamus in rats: a single-fibre study using biocytin as an  
986 anterograde tracer. *Eur J Neurosci* **7**, 19-30 (1995).
- 987 22. Briggs, F., Kiley, C.W., Callaway, E.M. & Usrey, W.M. Morphological substrates for parallel  
988 streams of corticogeniculate feedback originating in both V1 and V2 of the macaque  
989 monkey. *Neuron* **90**, 388-399 (2016).
- 990 23. Briggs, F. & Usrey, W.M. Parallel processing in the corticogeniculate pathway of the  
991 macaque monkey. *Neuron* **62**, 135-146 (2009).
- 992 24. Katz, L.C. Local circuitry of identified projection neurons in cat visual cortex brain slices. *J*  
993 *Neurosci* **7**, 1223-1249 (1987).
- 994 25. Killackey, H.P. & Sherman, S.M. Corticothalamic projections from the rat primary  
995 somatosensory cortex. *J Neurosci* **23**, 7381-7384 (2003).
- 996 26. Kwegyir-Afful, E.E. & Simons, D.J. Subthreshold receptive field properties distinguish  
997 different classes of corticothalamic neurons in the somatosensory system. *J Neurosci* **29**,  
998 964-972 (2009).
- 999 27. Usrey, W.M. & Fitzpatrick, D. Specificity in the axonal connections of layer VI neurons in tree  
1000 shrew striate cortex: Evidence for distinct granular and supragranular systems. *J Neurosci*  
1001 **16**, 1203-1218 (1996).
- 1002 28. Zhang, Z.W. & Deschenes, M. Intracortical axonal projections of lamina VI cells of the  
1003 primary somatosensory cortex in the rat: a single-cell labeling study. *J Neurosci* **17**, 6365-  
1004 6379 (1997).
- 1005 29. Thomson, A.M. Neocortical layer 6, a review. *Front Neuroanat* **4**, 13 (2010).
- 1006 30. Gong, S., *et al.* Targeting Cre recombinase to specific neuron populations with bacterial  
1007 artificial chromosome constructs. *J Neurosci* **27**, 9817-9823 (2007).

- 1008 31. Kim, J., Matney, C.J., Blankenship, A., Hestrin, S. & Brown, S.P. Layer 6 corticothalamic  
1009 neurons activate a cortical output layer, layer 5a. *J Neurosci* **34**, 9656-9664 (2014).
- 1010 32. Bortone, D.S., Olsen, S.R. & Scanziani, M. Translaminar inhibitory cells recruited by layer 6  
1011 corticothalamic neurons suppress visual cortex. *Neuron* **82**, 474-485 (2014).
- 1012 33. Brennecke, P., *et al.* Accounting for technical noise in single-cell RNA-seq experiments. *Nat*  
1013 *Methods* **10**, 1093-1095 (2013).
- 1014 34. Hicks, S., Teng, M. & Irizarry, R.A. On the widespread and critical impact of systematic bias  
1015 and batch effects in single-cell RNA-seq data. *BioRxiv* doi:10.1101/025528 (2015).
- 1016 35. Chung, N.C. & Storey, J.D. Statistical significance of variables driving systematic variation in  
1017 high-dimensional data. *Bioinformatics* **31**, 545-554 (2015).
- 1018 36. Kiselev, V.Y., *et al.* SC3: consensus clustering of single-cell RNA-seq data. *Nat Methods* **14**,  
1019 483-486 (2017).
- 1020 37. Lin, P., Troup, M. & Ho, J.W. CIDR: Ultrafast and accurate clustering through imputation for  
1021 single-cell RNA-seq data. *Genome Biol* **18**, 59 (2017).
- 1022 38. Lein, E.S., *et al.* Genome-wide atlas of gene expression in the adult mouse brain. *Nature* **445**,  
1023 168-176 (2007).
- 1024 39. Sauvageau, M., *et al.* Multiple knockout mouse models reveal lincRNAs are required for life  
1025 and brain development. *Elife* **2**, e01749 (2013).
- 1026 40. Joo, K.M., *et al.* Distribution of vasoactive intestinal peptide and pituitary adenylate cyclase-  
1027 activating polypeptide receptors (VPAC1, VPAC2, and PAC1 receptor) in the rat brain. *J Comp*  
1028 *Neurol* **476**, 388-413 (2004).
- 1029 41. Sun, Q.Q., Prince, D.A. & Huguenard, J.R. Vasoactive intestinal polypeptide and pituitary  
1030 adenylate cyclase-activating polypeptide activate hyperpolarization-activated cationic

- 1031 current and depolarize thalamocortical neurons in vitro. *J Neurosci* **23**, 2751-2758 (2003).
- 1032 42. Langfelder, P. & Horvath, S. WGCNA: an R package for weighted correlation network  
1033 analysis. *BMC Bioinformatics* **9**, 559 (2008).
- 1034 43. Lacar, B., *et al.* Nuclear RNA-seq of single neurons reveals molecular signatures of activation.  
1035 *Nat Commun* **7**, 11022 (2016).
- 1036 44. Mardinly, A.R., *et al.* Sensory experience regulates cortical inhibition by inducing IGF1 in VIP  
1037 neurons. *Nature* **531**, 371-375 (2016).
- 1038 45. Cho, J.H., Huang, B.S. & Gray, J.M. RNA sequencing from neural ensembles activated during  
1039 fear conditioning in the mouse temporal association cortex. *Sci Rep* **6**, 31753 (2016).
- 1040 46. Kim, T.K., *et al.* Widespread transcription at neuronal activity-regulated enhancers. *Nature*  
1041 **465**, 182-187 (2010).
- 1042 47. Wallace, H. & Fox, K. The effect of vibrissa deprivation pattern on the form of plasticity  
1043 induced in rat barrel cortex. *Somatosens Mot Res* **16**, 122-138 (1999).
- 1044 48. Fox, K. *Barrel Cortex* (Cambridge University Press, Cambridge, 2008).
- 1045 49. Fraley, C., Raftery, A.E., Murphy, T.B. & Scrucca, L. mclust Version 4 for R: Normal Mixture  
1046 Modeling for Model-Based Clustering, Classification, and Density Estimation Technical  
1047 Report No. 597. *Department of Statistics, University of Washington* (2012).
- 1048 50. Fraley, C. & Raftery, A.E. Model-based clustering, discriminant analysis and density  
1049 estimation. *Journal of the American Statistical Association* **97**, 611-631 (2002).
- 1050 51. Ehlers, M.D. Activity level controls postsynaptic composition and signaling via the ubiquitin-  
1051 proteasome system. *Nat Neurosci* **6**, 231-242 (2003).
- 1052 52. Spiegel, I., *et al.* Npas4 regulates excitatory-inhibitory balance within neural circuits through  
1053 cell-type-specific gene programs. *Cell* **157**, 1216-1229 (2014).



- 1054 53. Whitney, O., *et al.* Core and region-enriched networks of behaviorally regulated genes and  
1055 the singing genome. *Science* **346**, 1256780 (2014).
- 1056 54. Frenkel, M.Y. & Bear, M.F. How monocular deprivation shifts ocular dominance in visual  
1057 cortex of young mice. *Neuron* **44**, 917-923 (2004).
- 1058 55. Glazewski, S., Benedetti, B.L. & Barth, A.L. Ipsilateral whiskers suppress experience-  
1059 dependent plasticity in the barrel cortex. *J Neurosci* **27**, 3910-3920 (2007).
- 1060 56. Madisen, L., *et al.* A robust and high-throughput Cre reporting and characterization system  
1061 for the whole mouse brain. *Nat Neurosci* **13**, 133-140 (2010).
- 1062 57. Schindelin, J., *et al.* Fiji: an open-source platform for biological-image analysis. *Nat Methods*  
1063 **9**, 676-682 (2012).
- 1064 58. Agmon, A. & Connors, B.W. Thalamocortical responses of mouse somatosensory (barrel)  
1065 cortex in vitro. *Neuroscience* **41**, 365-379 (1991).
- 1066 59. Saxena, A., *et al.* Trehalose-enhanced isolation of neuronal sub-types from adult mouse  
1067 brain. *Biotechniques* **52**, 381-385 (2012).
- 1068 60. Picelli, S., *et al.* Full-length RNA-seq from single cells using Smart-seq2. *Nat Protoc* **9**, 171-  
1069 181 (2014).
- 1070 61. Mudge, J.M. & Harrow, J. Creating reference gene annotation for the mouse C57BL6/J  
1071 genome assembly. *Mamm Genome* **26**, 366-378 (2015).
- 1072 62. Blackshaw, S. High-throughput RNA in situ hybridization in mouse retina. *Methods Mol Biol*  
1073 **935**, 215-226 (2013).
- 1074 63. Goff, L.A., *et al.* Spatiotemporal expression and transcriptional perturbations by long  
1075 noncoding RNAs in the mouse brain. *Proc Natl Acad Sci U S A* **112**, 6855-6862 (2015).
- 1076 64. Mueller, F., *et al.* FISH-quant: automatic counting of transcripts in 3D FISH images. *Nat*

- 1077        *Methods* **10**, 277-278 (2013).
- 1078    65. Li, X., Glazewski, S., Lin, X., Elde, R. & Fox, K. Effect of vibrissae deprivation on follicle  
1079        innervation, neuropeptide synthesis in the trigeminal ganglion, and S1 barrel cortex  
1080        plasticity. *J Comp Neurol* **357**, 465-481 (1995).
- 1081    66. Kim, D., Langmead, B. & Salzberg, S.L. HISAT: a fast spliced aligner with low memory  
1082        requirements. *Nat Methods* **12**, 357-360 (2015).
- 1083    67. Trapnell, C., *et al.* Differential analysis of gene regulation at transcript resolution with RNA-  
1084        seq. *Nat Biotechnol* **31**, 46-53 (2013).
- 1085    68. Trapnell, C., *et al.* Differential gene and transcript expression analysis of RNA-seq  
1086        experiments with TopHat and Cufflinks. *Nat Protoc* **7**, 562-578 (2012).
- 1087    69. Trapnell, C., *et al.* The dynamics and regulators of cell fate decisions are revealed by  
1088        pseudotemporal ordering of single cells. *Nat Biotechnol* **32**, 381-386 (2014).
- 1089    70. Huber, W., *et al.* Orchestrating high-throughput genomic analysis with Bioconductor. *Nat*  
1090        *Methods* **12**, 115-121 (2015).
- 1091    71. Wood, S.N. Fast stable restricted maximum likelihood and marginal likelihood estimation of  
1092        semiparametric generalized linear models. *Journal of the Royal Statistical Society: Series B*  
1093        (*Statistical Methodology*) **73**, 3-36 (2011).
- 1094    72. Krijthe, J. Rtsne: T-distributed stochastic neighbor embedding using Barnes-Hus  
1095        implementation. R package version 0.10. <https://CRAN.R-project.org/package=Rtsne>.  
1096        (2015).
- 1097    73. Macosko, E.Z., *et al.* Highly parallel genome-wide expression profiling of individual cells  
1098        using nanoliter droplets. *Cell* **161**, 1202-1214 (2015).
- 1099    74. Ashburner, M., *et al.* Gene ontology: tool for the unification of biology. The Gene Ontology

- 1100 Consortium. *Nat Genet* **25**, 25-29 (2000).
- 1101 75. Yu, G. & He, Q.Y. ReactomePA: an R/Bioconductor package for reactome pathway analysis  
1102 and visualization. *Mol Biosyst* **12**, 477-479 (2016).
- 1103 76. Yu, G., Wang, L.G., Han, Y. & He, Q.Y. clusterProfiler: an R package for comparing biological  
1104 themes among gene clusters. *OMICS* **16**, 284-287 (2012).
- 1105 77. Kolde, R. pheatmap: Pretty heatmaps. R package verion 1.0.8. [https://CRAN.R-](https://CRAN.R-project.org/package=pheatmap)  
1106 [project.org/package=pheatmap](https://CRAN.R-project.org/package=pheatmap). (2015).
- 1107 78. Subramanian, A., *et al.* Gene set enrichment analysis: a knowledge-based approach for  
1108 interpreting genome-wide expression profiles. *Proc Natl Acad Sci U S A* **102**, 15545-15550  
1109 (2005).

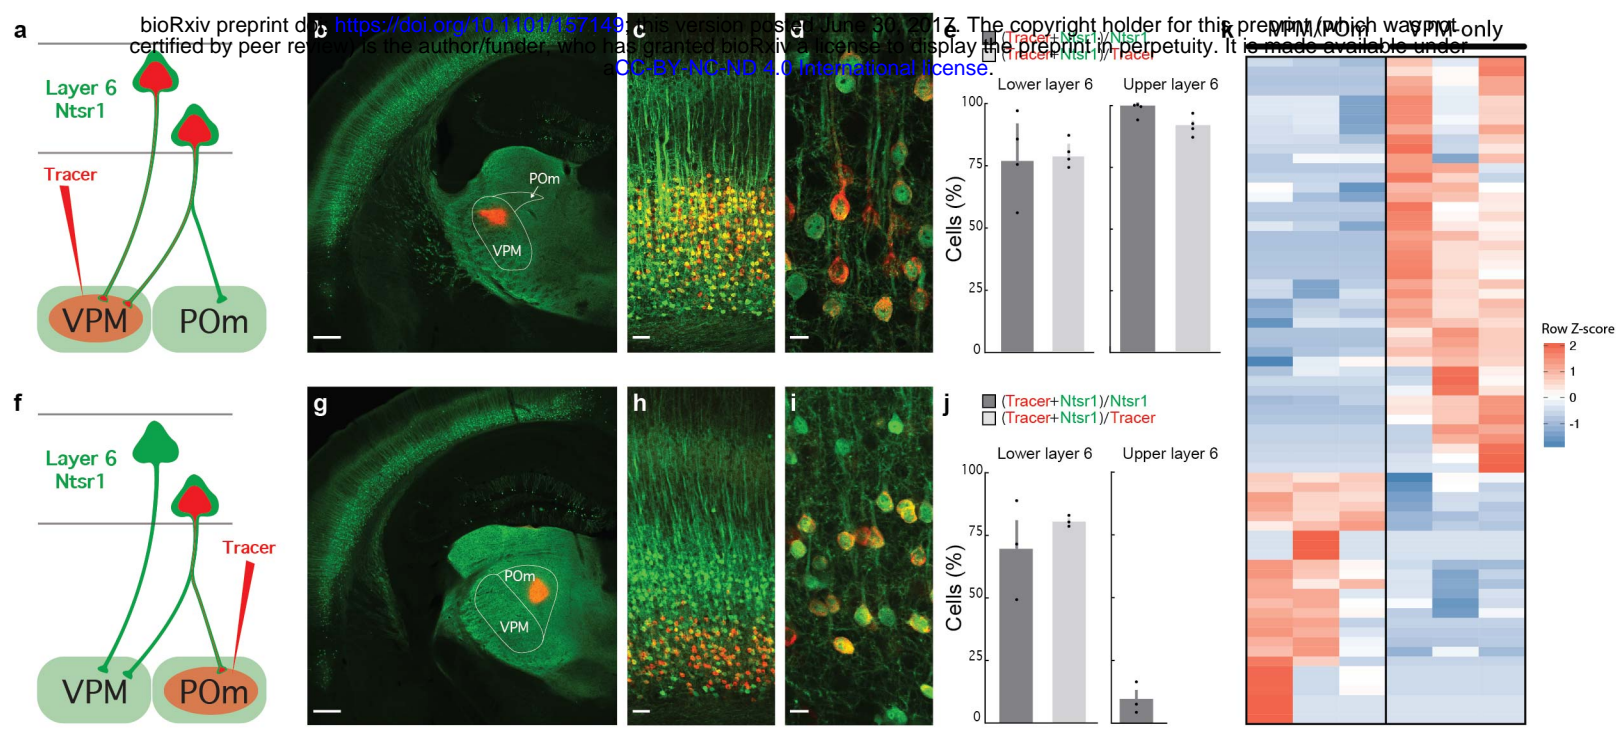

Figure 1  
Chevéé et al.

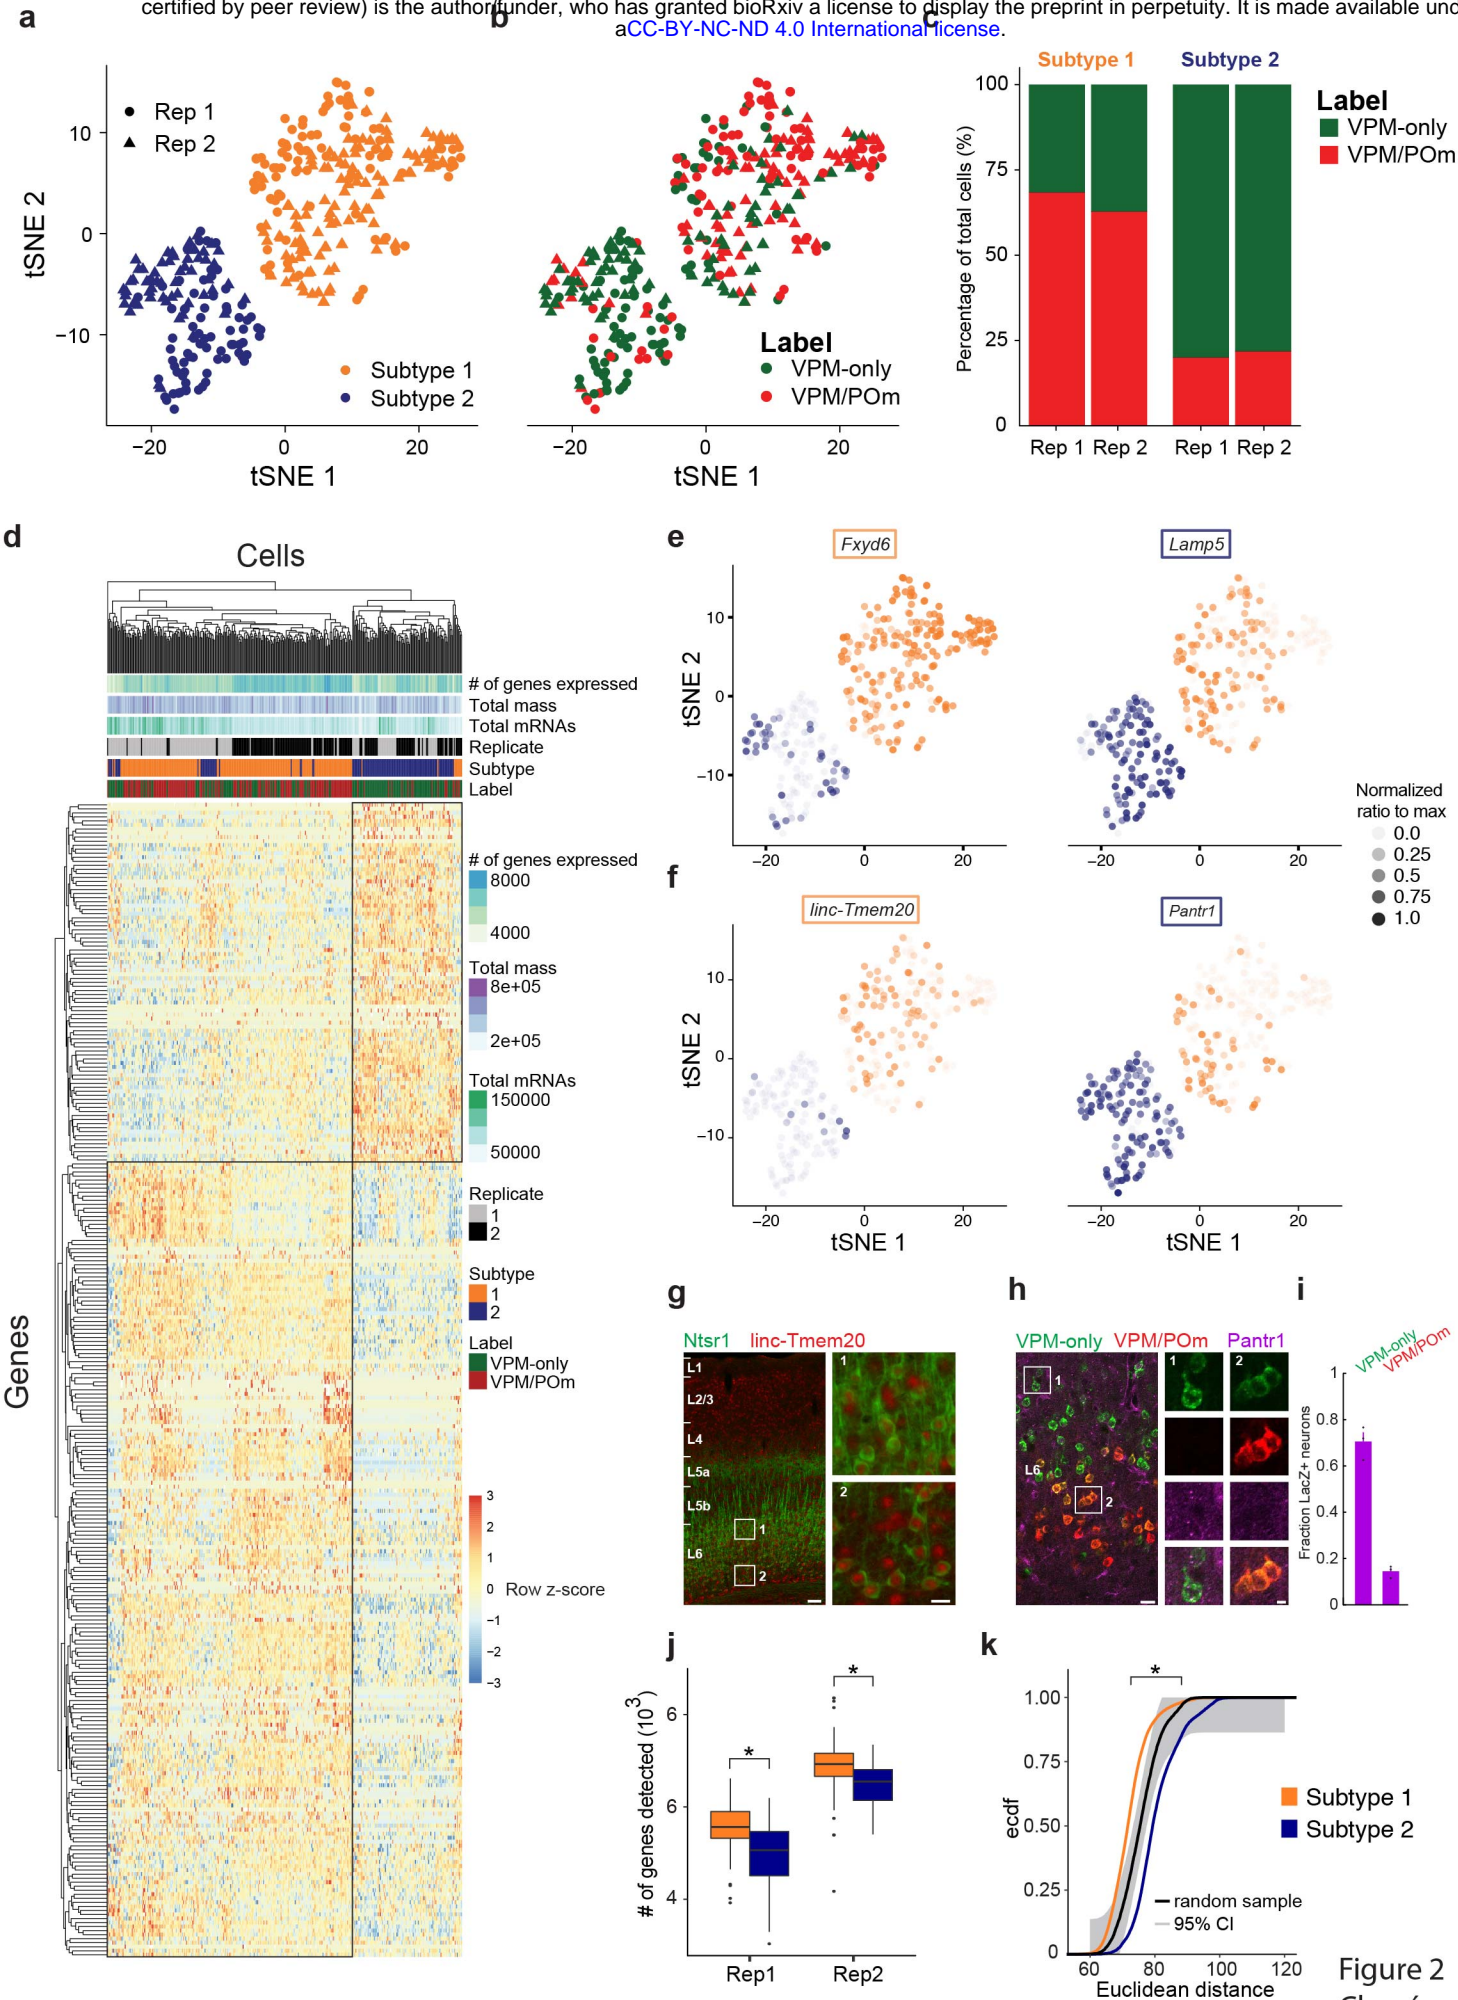

Figure 2  
Chevéé et al.

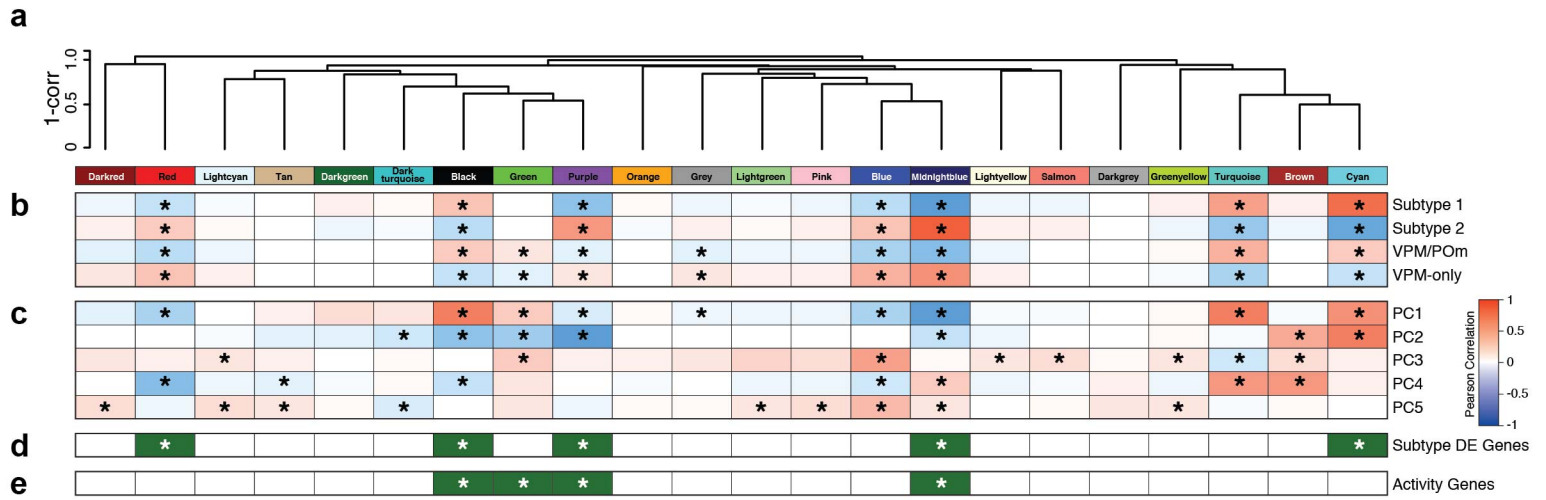

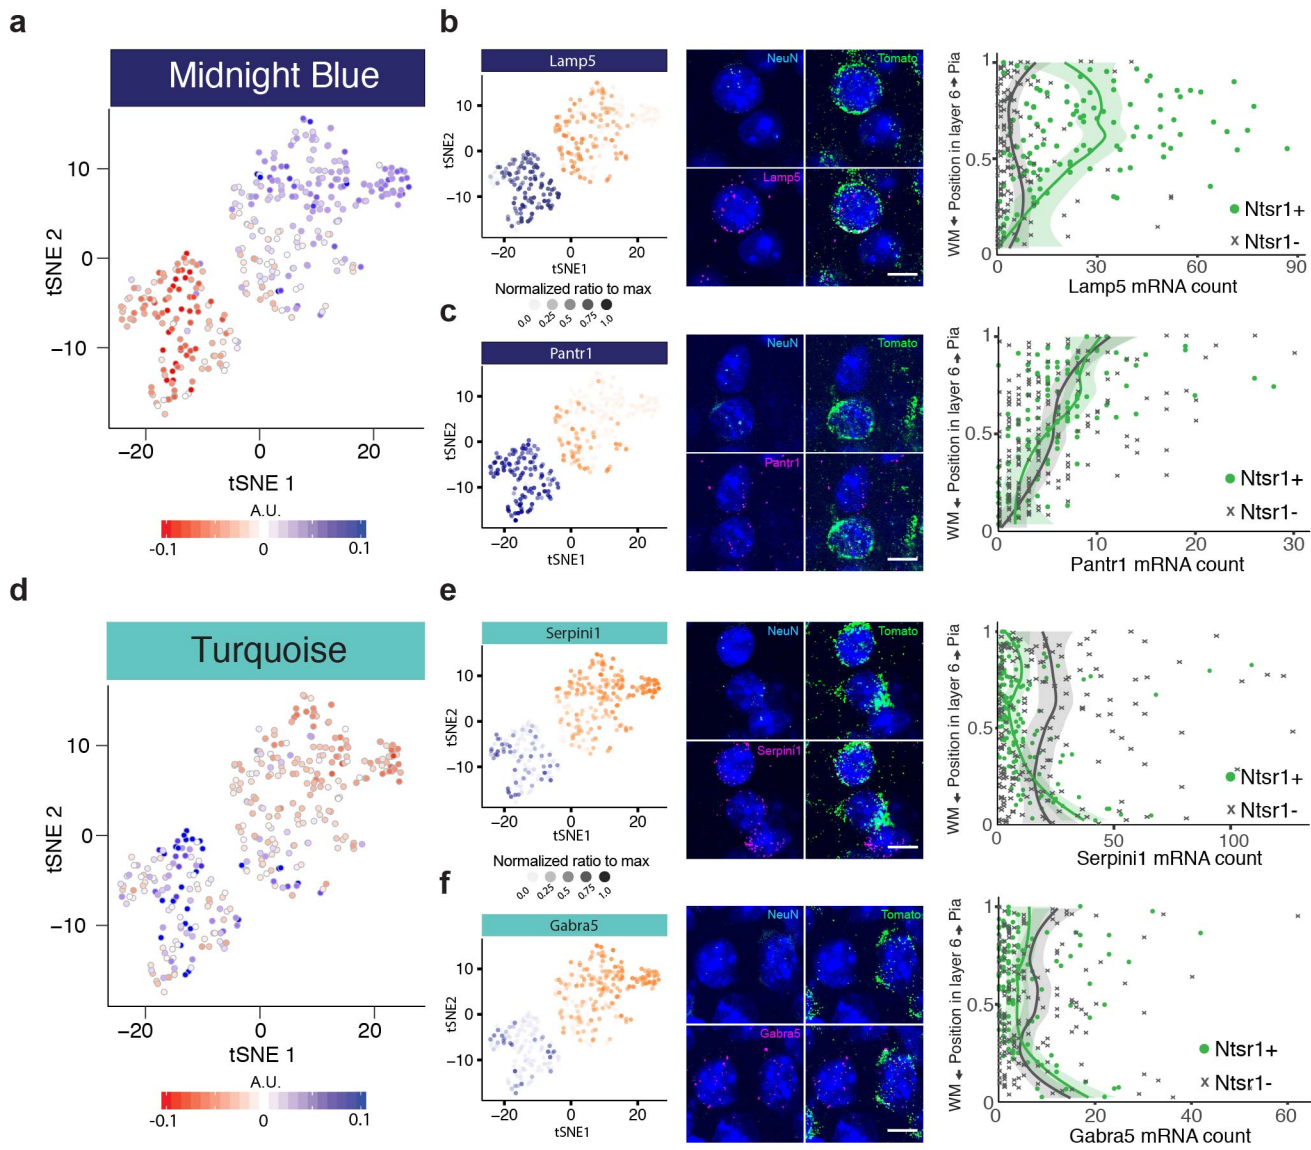

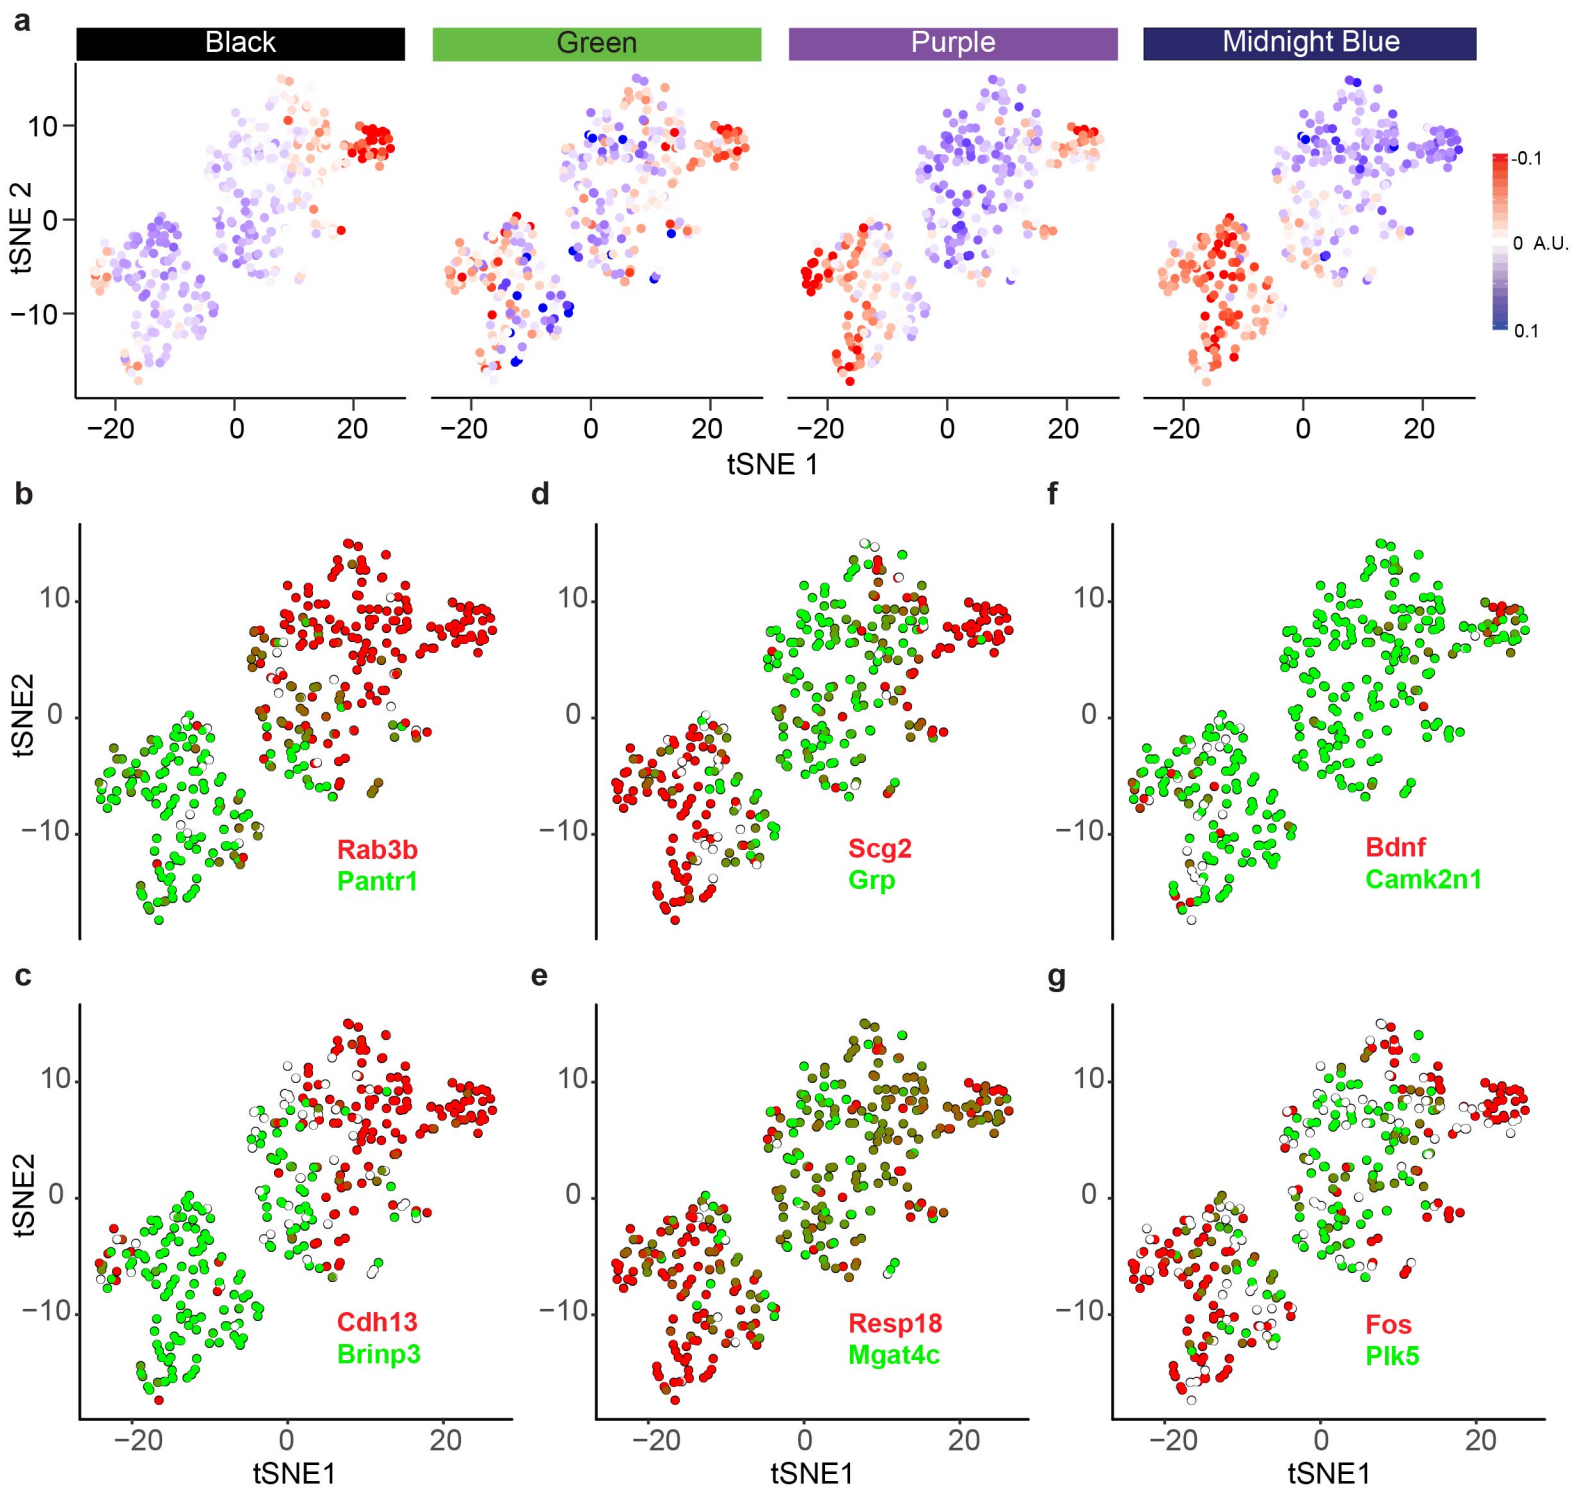

Figure 5  
Chevée et al.



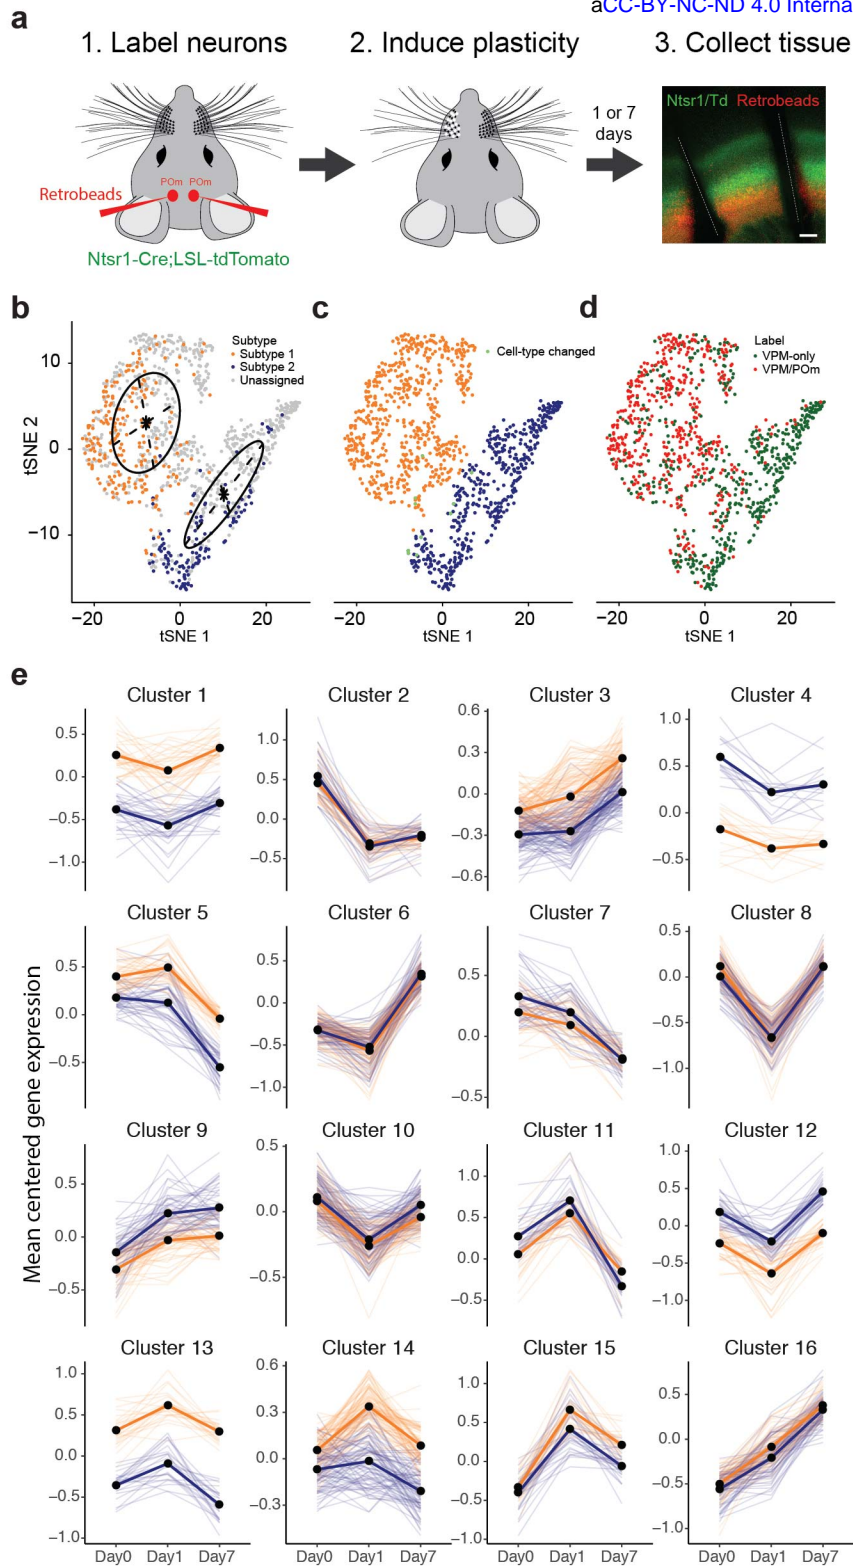

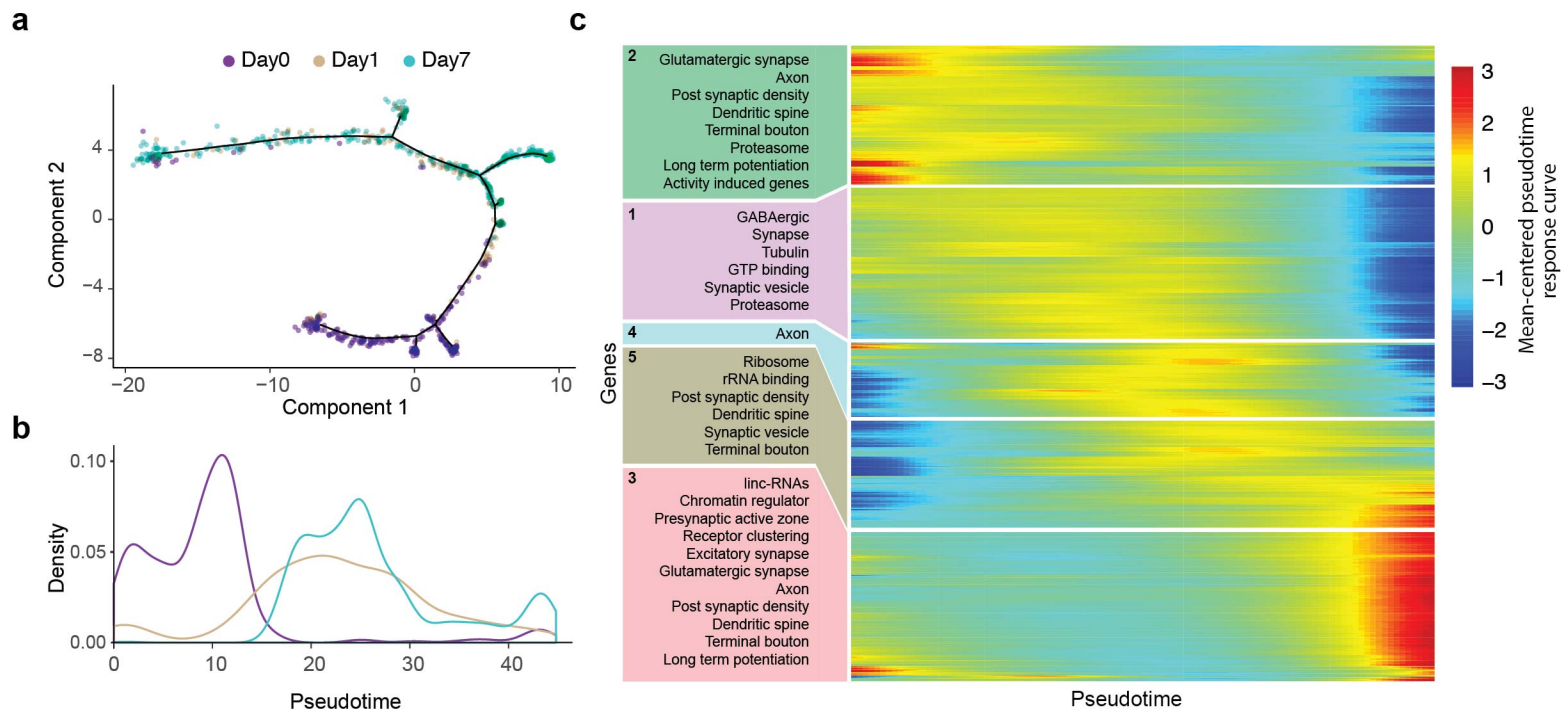

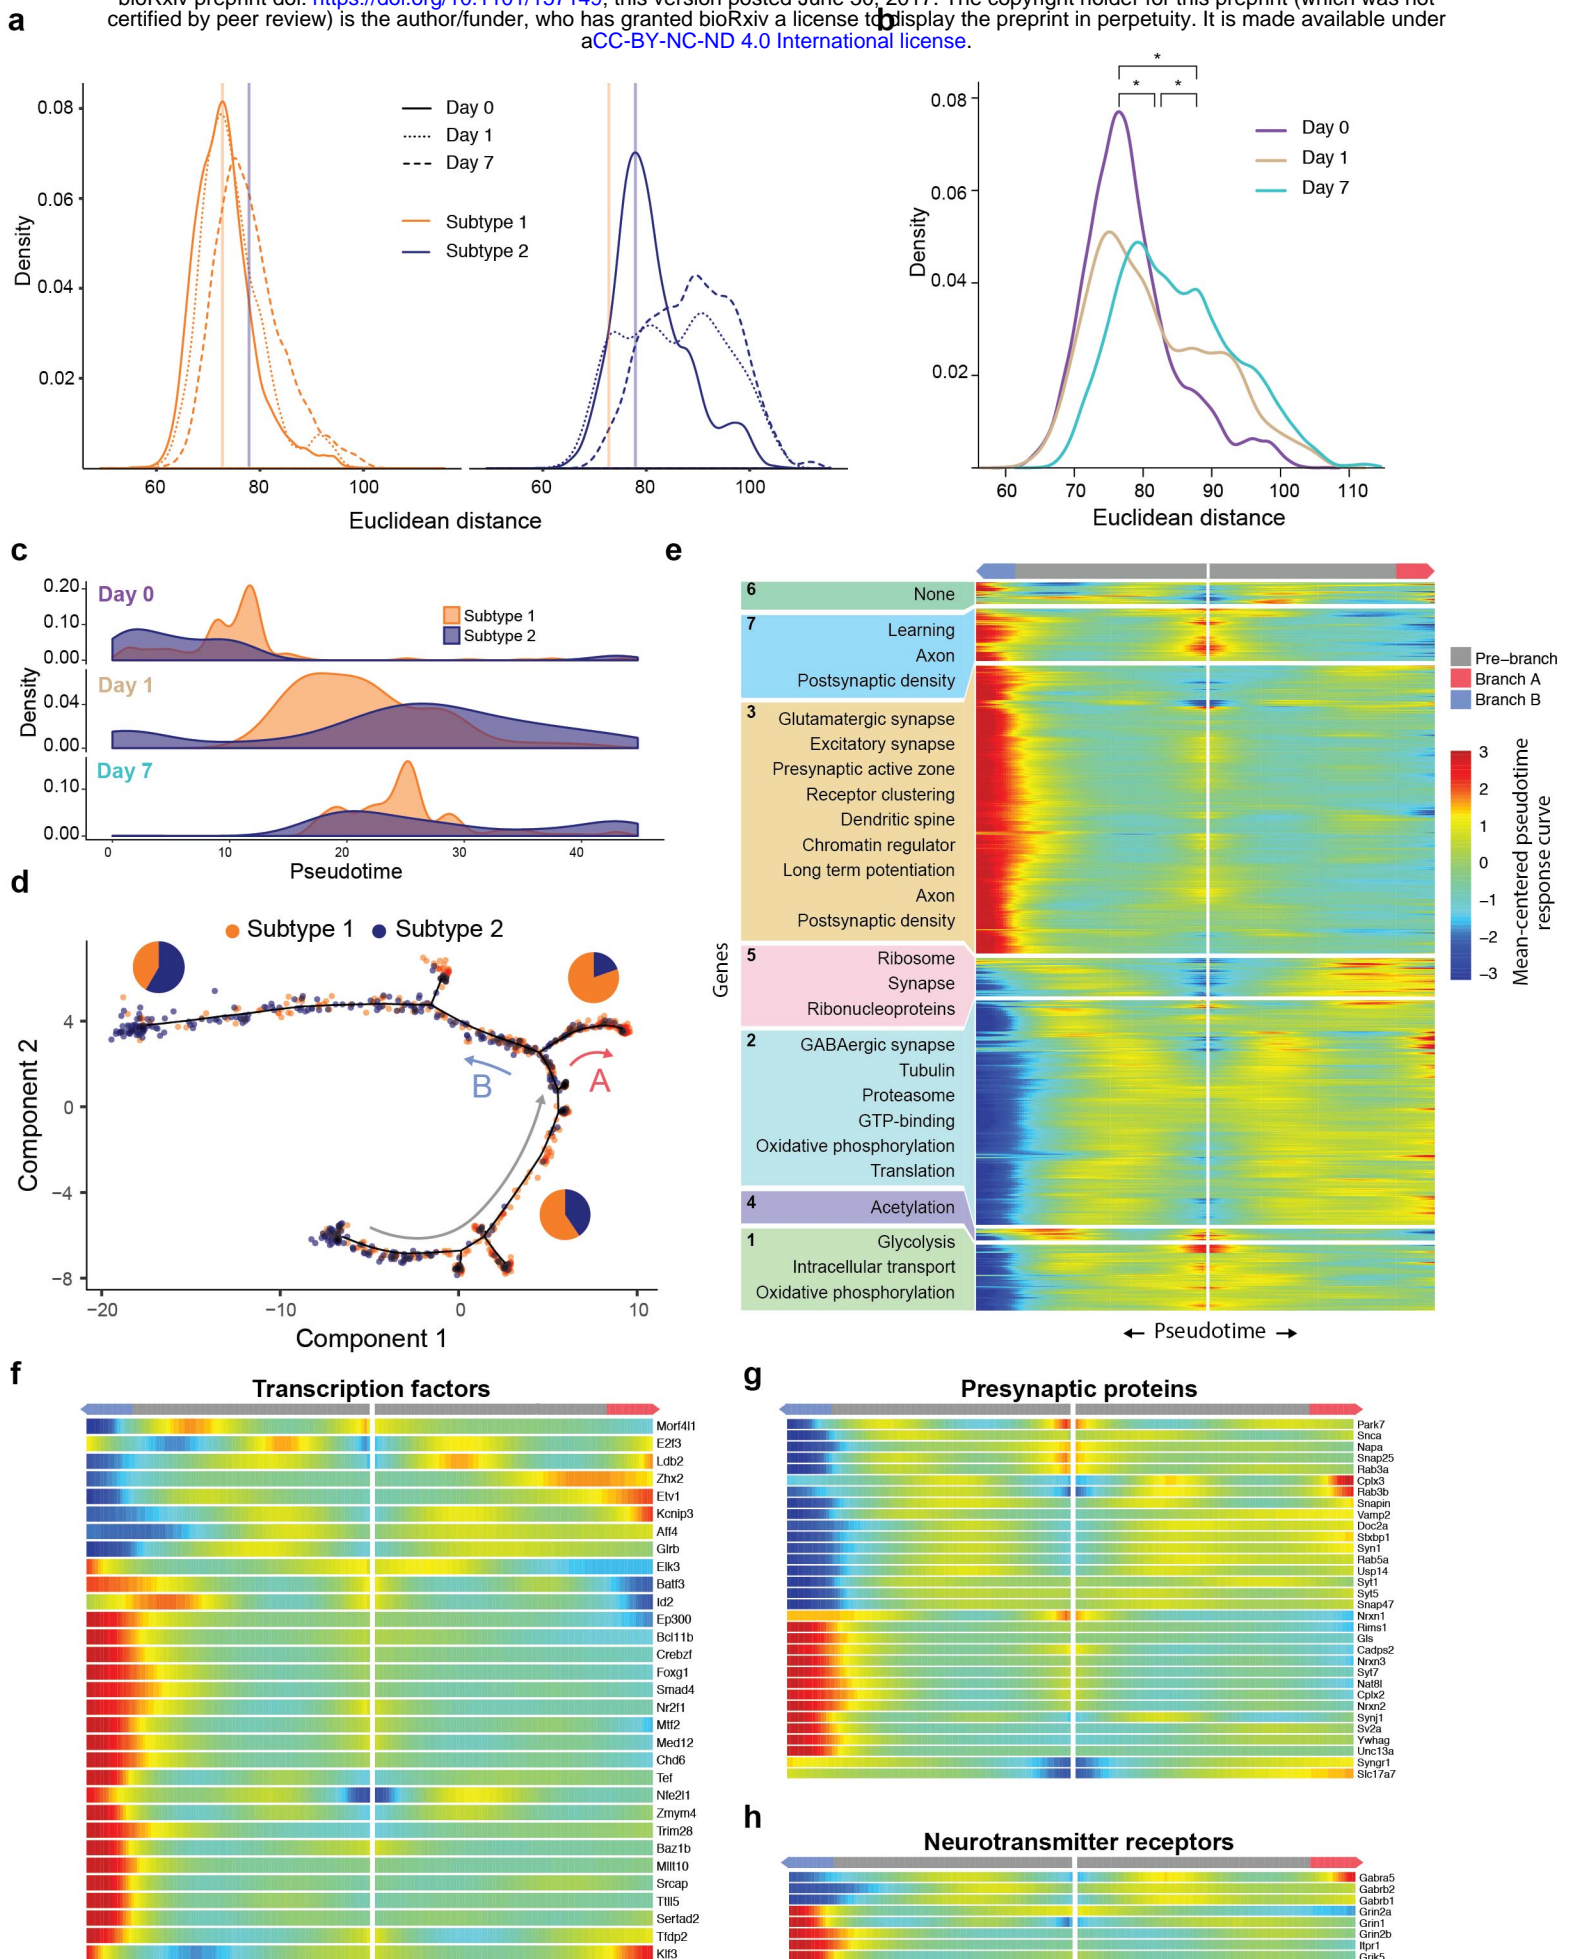

Figure 8  
Chevéé et al.
